# Supplementary material
Source: PubMed Central journal article supplement (PMC4801980)
Supplement: ECE3-6-1656-s005.pdf [file ECE3-6-1656-s005.pdf]

# Package ‘fullfact’

December 1, 2015

**Version** 1.0

**Date** 2015-12-01

**Title** Full Factorial Breeding Analysis

**Author** Aimee Lee Houde [aut, cre], Trevor Pitcher [aut]

**Maintainer** Aimee Lee Houde <aimee.lee.houde@gmail.com>

**Depends** R (>= 3.2.2), lme4, afex

**Description** Package for the analysis of full factorial breeding designs.

**License** GPL (>=2)

**URL** <http://www.r-project.org>

**BugReports** Aimee Lee Houde <aimee.lee.houde@gmail.com>

**NeedsCompilation** no

## R topics documented:

|                            |    |
|----------------------------|----|
| fullfact-package . . . . . | 2  |
| barMANA . . . . .          | 5  |
| boxMANA . . . . .          | 6  |
| buildBinary . . . . .      | 8  |
| buildMulti . . . . .       | 9  |
| chinook_bootL . . . . .    | 10 |
| chinook_bootS . . . . .    | 11 |
| chinook_jackL . . . . .    | 12 |
| chinook_length . . . . .   | 13 |
| chinook_resampL . . . . .  | 14 |
| chinook_resampS . . . . .  | 15 |
| chinook_survival . . . . . | 16 |
| ciJack . . . . .           | 17 |
| ciJack2 . . . . .          | 19 |
| ciJack3 . . . . .          | 20 |
| ciMANA . . . . .           | 21 |
| ciMANA2 . . . . .          | 22 |
| ciMANA3 . . . . .          | 24 |
| JackGlmer . . . . .        | 25 |
| JackGlmer2 . . . . .       | 27 |
| JackGlmer3 . . . . .       | 29 |
| JackLmer . . . . .         | 31 |

|                        |    |
|------------------------|----|
| JackLmer2 . . . . .    | 33 |
| JackLmer3 . . . . .    | 35 |
| observGlmer . . . . .  | 37 |
| observGlmer2 . . . . . | 38 |
| observGlmer3 . . . . . | 40 |
| observLmer . . . . .   | 42 |
| observLmer2 . . . . .  | 43 |
| observLmer3 . . . . .  | 44 |
| powerGlmer . . . . .   | 46 |
| powerGlmer2 . . . . .  | 47 |
| powerGlmer3 . . . . .  | 49 |
| powerLmer . . . . .    | 51 |
| powerLmer2 . . . . .   | 53 |
| powerLmer3 . . . . .   | 54 |
| resampFamily . . . . . | 56 |
| resampGlmer . . . . .  | 57 |
| resampGlmer2 . . . . . | 59 |
| resampGlmer3 . . . . . | 60 |
| resampLmer . . . . .   | 62 |
| resampLmer2 . . . . .  | 64 |
| resampLmer3 . . . . .  | 65 |
| resampRepli . . . . .  | 67 |

|              |           |
|--------------|-----------|
| <b>Index</b> | <b>68</b> |
|--------------|-----------|

---

|                  |                                         |
|------------------|-----------------------------------------|
| fullfact-package | <i>Full Factorial Breeding Analysis</i> |
|------------------|-----------------------------------------|

---

## Description

Analysis of full factorial breeding designs. The package incorporates mixed-effects models suited for unbalanced experimental designs and non-normal data types. Extracts variance components and significance values for random and fixed effects. Calculates the amount of additive genetic, non-additive genetic, and maternal variance explaining phenotypic traits. Produces confidence values using a bootstrap resampling routine and can apply bias and acceleration correction. Also includes an option for producing jackknife resampling confidence intervals. Calculates the power values of random and fixed effects.

## Details

The DESCRIPTION file:

```

Package:    fullfact
Version:    1.0
Date:       2015-12-01
Title:      Full Factorial Breeding Analysis
Author:     Aimee Lee Houde [aut, cre], Trevor Pitcher [aut]
Maintainer: Aimee Lee Houde <aimee.lee.houde@gmail.com>
Depends:    R (>= 3.2.2), lme4, afex
Description: Package for the analysis of full factorial breeding designs.
License:    GPL (>=2)
URL:        http://www.r-project.org

```

BugReports: Aimee Lee Houde <aimee.lee.houde@gmail.com>

Index of help topics:

|                  |                                               |
|------------------|-----------------------------------------------|
| JackGlmr         | Jackknife components for non-normal data      |
| JackGlmr2        | Jackknife components for non-normal data 2    |
| JackGlmr3        | Jackknife components for non-normal data 3    |
| JackLmer         | Jackknife components for normal data          |
| JackLmer2        | Jackknife components for normal data 2        |
| JackLmer3        | Jackknife components for normal data 3        |
| barMANA          | Bargraph of confidence intervals              |
| boxMANA          | Boxplot of resampled results                  |
| buildBinary      | Convert to a binary data frame                |
| buildMulti       | Convert to a multinomial frame                |
| chinook_bootL    | Chinook salmon length, bootstrap calculations |
| chinook_bootS    | Chinook salmon survival, bootstrap data       |
| chinook_jackL    | Chinook salmon length, jackknife data         |
| chinook_length   | Chinook salmon length, raw data               |
| chinook_resampL  | Chinook salmon length, bootstrap resampled    |
| chinook_resampS  | Chinook salmon survival, bootstrap resampled  |
| chinook_survival | Chinook salmon survival, raw data             |
| ciJack           | Jackknife confidence intervals                |
| ciJack2          | Jackknife confidence intervals 2              |
| ciJack3          | Jackknife confidence intervals 3              |
| ciMANA           | Bootstrap confidence intervals                |
| ciMANA2          | Bootstrap confidence intervals 2              |
| ciMANA3          | Bootstrap confidence intervals 3              |
| fullfact-package | Full Factorial Breeding Analysis              |
| observGlmr       | Variance components for non-normal data       |
| observGlmr2      | Variance components for non-normal data 2     |
| observGlmr3      | Variance components for non-normal data 3     |
| observLmer       | Variance components for normal data           |
| observLmer2      | Variance components for normal data 2         |
| observLmer3      | Variance components for normal data 3         |
| powerGlmr        | Power analysis for non-normal data            |
| powerGlmr2       | Power analysis for non-normal data 2          |
| powerGlmr3       | Power analysis for non-normal data 3          |
| powerLmer        | Power analysis for normal data                |
| powerLmer2       | Power analysis for normal data 2              |
| powerLmer3       | Power analysis for normal data 3              |
| resampFamily     | Bootstrap resample within families            |
| resampGlmr       | Bootstrap components for non-normal data      |
| resampGlmr2      | Bootstrap components for non-normal data 2    |
| resampGlmr3      | Bootstrap components for non-normal data 3    |
| resampLmer       | Bootstrap components for normal data          |
| resampLmer2      | Bootstrap components for normal data 2        |
| resampLmer3      | Bootstrap components for normal data 3        |
| resampRepli      | Bootstrap resample within replicates          |

**Author(s)**

Aimee Lee Houde [aut, cre], Trevor Pitcher [aut]

Maintainer: Aimee Lee Houde <aimee.lee.houde@gmail.com>

## References

Traditional full factorial breeding design analysis:

Lynch M, Walsh B. 1998. Genetics and Analysis of Quantitative Traits. Sinauer Associates, Massachusetts.

Residual variance component values for generalized linear mixed-effects models:

Nakagawa S, Schielzeth H. 2010. Repeatability for Gaussian and non-Gaussian data: a practical guide for biologists. *Biological Reviews* 85(4): 935-956. DOI: 10.1111/j.1469-185X.2010.00141.x

Fixed effect variance component values for mixed-effects models:

Nakagawa S, Schielzeth H. 2013. A general and simple method for obtaining  $R^2$  from generalized linear mixed-effects models. *Methods in Ecology and Evolution* 4(2): 133-142. DOI: 10.1111/j.2041-210x.2012.00261.x

Confidence intervals (bootstrap resampling, bias and acceleration correction, jackknife resampling):

Efron B, Tibshirani R. 1993. An introduction to the Bootstrap. Chapman and Hall, New York.

Martin, H., Westad, F. & Martens, H. (2004). Improved Jackknife Variance Estimates of Bilinear Model Parameters. COMPSTAT 2004 – Proceedings in Computational Statistics 16th Symposium Held in Prague, Czech Republic, 2004 (ed J. Antoch), pp. 261-275. Physica-Verlag HD, Heidelberg.

Data sources:

Pitcher TE, Neff BD. 2007. Genetic quality and offspring performance in Chinook salmon: implications for supportive breeding. *Conservation Genetics* 8(3):607-616. DOI: 10.1007/s10592-006-9204-z

## Examples

```
data(chinook_length) #Chinook salmon offspring length

## Standard additive genetic, non-additive genetic, and maternal variance analysis

length_mod1<- observLmer(observ=chinook_length,dam="dam",sire="sire",response="length")
length_mod1

## Confidence intervals

##Bootstrap resampling of data: replicates within family
#resampRepli(dat=chinook_length,copy=c(3:8),family="family",replicate="repli",iter=1000)
resampRepli(dat=chinook_length,copy=c(3:8),family="family",replicate="repli",iter=5)
#example of 5 iterations
#saves the files in working directory: one for each replicate and
#one final (combined) file "resamp_datR.csv"

##Import file
#length_datR<- read.csv("resamp_datR.csv")
data(chinook_resampL) #same as length_datR, 5 iterations

##Models for the resampled data: standard analysis
#length_rcomp<- resampLmer(resamp=length_datR,dam="dam",sire="sire",response="length",
#start=1,end=1000)
length_rcomp<- resampLmer(resamp=chinook_resampL,dam="dam",sire="sire",response="length",
start=1,end=5) #example of 5 models
```

```
## 1. Uncorrected Bootstrap 95% confidence interval

#ciMANA(comp=length_rcomp)
data(chinook_bootL) #similar to length_rcomp, but 1,000 models
ciMANA(comp=chinook_bootL)

## 2. Bias and accelerated corrected Bootstrap 95% confidence interval

##Jackknife resampling of data, delete-one: for acceleration estimate
#length_jack<- JackLmer(observ=chinook_length,dam="dam",sire="sire",
#response="length")
length_jack<- JackLmer(observ=chinook_length,dam="dam",sire="sire",
response="length",first=10) #example of first 10 observations

#ciMANA(comp=length_rcomp,bias=c(0.0000000,0.7192253,0.2029684),accel=length_jack)
data(chinook_jackL) #similar to length_jack, but all observations
ciMANA(comp=chinook_bootL,bias=c(0.0000000,0.7192253,0.2029684),accel=chinook_jackL)

##3. Jackknife 95% confidence interval

#ciJack(comp=length_jack,full=c(0.0000000,0.7192253,0.2029684,1.0404425))
ciJack(comp=chinook_jackL,full=c(0.0000000,0.7192253,0.2029684,1.0404425))
```

---

barMANA

*Bargraph of confidence intervals*


---

## Description

A simple bargraph function for confidence intervals of additive genetic, non-additive genetic, and maternal variance components. Also, plots the median for the bootstrap resampling method or mean of the pseudo-values for the jackknife resampling method.

## Usage

```
barMANA(ci_dat, type = "perc", bar_len = 0.1, ymax = NULL, ymin = NULL, yunit = NULL,
leg = "topright", cex_ylab = 1, cex_yaxis = 1, cex_names = 1)
```

## Arguments

|           |                                                                                                                              |
|-----------|------------------------------------------------------------------------------------------------------------------------------|
| ci_dat    | Data frame of a confidence interval function.                                                                                |
| type      | Default is "perc" for percentage values of variance components. Other option is "raw" for raw values of variance components. |
| bar_len   | Length of error bar in inches.                                                                                               |
| ymax      | Maximum value of the y-axis.                                                                                                 |
| ymin      | Minimum value of the y-axis.                                                                                                 |
| yunit     | Unit increment of the y-axis.                                                                                                |
| leg       | Position of the simple legend.                                                                                               |
| cex_ylab  | Magnification of the y-axis label.                                                                                           |
| cex_yaxis | Magnification of the y-axis units.                                                                                           |
| cex_names | Optional magnification of trait labels.                                                                                      |

## Details

Plots a bargraph with the median or mean as the top of the shaded bar and error bars covering the range of the confidence interval. Uses an object produced by any of the bootstrap resampling CI functions, i.e. *ciMANA*, *ciMANA2*, and *ciMANA3* or jackknife resampling functions, i.e. *ciJack*, *ciJack2*, and *ciJack3*. The median is plotted for bootstrap resampling and the mean of pseudo-value for jackknife resampling. Produces a simple legend. The function can plot several bar graphs grouped by *label* to visualize several phenotypic traits.

## Examples

```
##Import bootstrap resampling results
data(chinook_bootS) #Chinook salmon offspring survival
#Extract un-corrected confidence interval
survival_ci<- ciMANA(comp=chinook_bootS,trait="survival")
survival_ci

#Default plot
barMANA(ci_dat=survival_ci)
#Add plot modifications
barMANA(ci_dat=survival_ci,bar_len=0.3,yunit=5,ymax=20,cex_ylab=1.3)

##Import jackknife resampling results
data(chinook_jackL) #Chinook salmon offspring length
#Extract jackknife confidence interval
length_ci<- ciJack2(comp=chinook_jackL,full=c(0.0000000,0.7192253,0.2029684,1.0404425,
0.1077423),position="tray",trait="length")
length_ci

#Default plot
barMANA(ci_dat=length_ci)
#Add plot modifications
barMANA(ci_dat=length_ci,bar_len=0.3,yunit=20,ymax=100,cex_ylab=1.3)

##Group survival and length together in the same plot
data(chinook_bootL) #Chinook salmon offspring length
length_ci2<- ciMANA2(comp=chinook_bootL,position="tray",trait="length")
length_ci2
#
comb_r<- rbind(survival_ci$raw,length_ci2$raw)
comb_p<- rbind(survival_ci$percentage,length_ci2$percentage)
comb_ci<- list(raw=comb_r,percentage=comb_p)

#Default plot
barMANA(ci_dat=comb_ci)
#Add plot modifications
barMANA(ci_dat=comb_ci,bar_len=0.3,yunit=20,ymax=100,cex_ylab=1.3,leg="topleft")
```

---

boxMANA

*Boxplot of resampled results*

---

## Description

A simple boxplot function for bootstrap and jackknife resampled results of additive genetic, non-additive genetic, and maternal variance components.

**Usage**

```
boxMANA(comp, type = "perc", ymax = NULL, ymin = NULL, yunit = NULL, leg = "topright",
cex_ylab = 1, cex_yaxis = 1, cex_names = 1)
```

**Arguments**

|           |                                                                                                                              |
|-----------|------------------------------------------------------------------------------------------------------------------------------|
| comp      | Data frame of bootstrap or jackknife resampling results.                                                                     |
| type      | Default is "perc" for percentage values of variance components. Other option is "raw" for raw values of variance components. |
| ymax      | Maximum value of the y-axis.                                                                                                 |
| ymin      | Minimum value of the y-axis.                                                                                                 |
| yunit     | Unit increment of the y-axis.                                                                                                |
| leg       | Position of the simple legend.                                                                                               |
| cex_ylab  | Magnification of the y-axis label.                                                                                           |
| cex_yaxis | Magnification of the y-axis units.                                                                                           |
| cex_names | Optional magnification of trait labels.                                                                                      |

**Details**

Plots an R boxplot. Uses an object produced by any of the bootstrap resampling functions, i.e. *resampLmer*, *resampLmer2*, *resampLmer3*, *resampGlmer*, *resampGlmer2*, and *resampGlmer3*. Or any of the jackknife resampling functions, i.e. *JackLmer*, *JackLmer2*, *JackLmer3*, *JackGlmer*, *JackGlmer2*, and *JackGlmer3*. Produces a simple legend.

**Examples**

```
#Import bootstrap resampled data model results
data(chinook_bootL) #Chinook salmon offspring length

#Default plot
boxMANA(comp=chinook_bootL)
#Add plot modifications
boxMANA(comp=chinook_bootL,yunit=20,ymax=100,cex_ylab=1.3)

##Group length and survival together in the same plot
data(chinook_bootS) #Chinook salmon offspring survival
chinook_bootL$trait<- "length"
chinook_bootS$trait<- "survival"

colnames(chinook_bootL[,-2])
colnames(chinook_bootS)
#
comb_boot<- rbind(chinook_bootL[,-2],chinook_bootS) #remove 'tray'
comb_boot$trait<- as.factor(comb_boot$trait) #to form levels

#Default plot
boxMANA(comp=comb_boot)
#Add plot modifications
boxMANA(comp=comb_boot,yunit=20,ymax=100,cex_ylab=1.3)
```

---

|             |                                       |
|-------------|---------------------------------------|
| buildBinary | <i>Convert to a binary data frame</i> |
|-------------|---------------------------------------|

---

### Description

Assign a binary number (i.e. '0' or '1') to two columns containing the number of offspring. Copy information by the number of times equal to the number of offspring.

### Usage

```
buildBinary(dat, copy, one, zero)
```

### Arguments

|      |                                              |
|------|----------------------------------------------|
| dat  | Data frame to convert.                       |
| copy | Column numbers to copy.                      |
| one  | Column name of counts to assign a '1' value. |
| zero | Column name of counts to assign a '0' value. |

### Details

Replicate-level data should be converted to the individual-level to not underestimate phenotypic variance, which can influence genetic and maternal estimates (see Puurtinen et al. 2009).

### Value

A converted data frame with a number of row matching the total number of individuals.

### References

Puurtinen M, Ketola T, Kotiaho JS. 2009. The good-genes and compatible-genes benefits of mate choice. *The American Naturalist* 174(5): 741-752. DOI: 10.1086/606024

### See Also

[buildMulti](#)

### Examples

```
data(chinook_survival)
chinook_survival2<- buildBinary(dat=chinook_survival,copy=c(1:6,9),one="alive",zero="dead")
```



---

|            |                                       |
|------------|---------------------------------------|
| buildMulti | <i>Convert to a multinomial frame</i> |
|------------|---------------------------------------|

---

### Description

Assign multiple numbers to multiple columns containing the number of offspring. Copy information by the number of times equal to the number of offspring.

### Usage

```
buildMulti(dat, copy, multi)
```

### Arguments

|       |                                                                                                                             |
|-------|-----------------------------------------------------------------------------------------------------------------------------|
| dat   | Data frame to convert.                                                                                                      |
| copy  | Column numbers to copy.                                                                                                     |
| multi | A list containing the numbers to assign and matching column names. E.g. <code>list(c(2,0,1),c("two","zero","one"))</code> . |

### Details

Replicate-level data should be converted to the individual-level to not underestimate phenotypic variance, which can influence genetic and maternal estimates (see Puurtinen et al. 2009).

### Value

A converted data frame with a number of row matching the total number of individuals.

### References

Puurtinen M, Ketola T, Kotiaho JS. 2009. The good-genes and compatible-genes benefits of mate choice. *The American Naturalist* 174(5): 741-752. DOI: 10.1086/606024

### See Also

[buildBinary](#)

### Examples

```
data(chinook_survival)
chinook_survival$total<- chinook_survival$alive + chinook_survival$dead #create total column
chinook_survival3<- buildMulti(dat=chinook_survival,copy=c(1:6,9),multi=list(c(2,1,0),
c("total","alive","dead")))
```

---

`chinook_bootL`*Chinook salmon length, bootstrap calculations*

---

**Description**

Bootstrap resampled Chinook salmon fork length (mm) at hatch with the amount of additive genetic, non-additive genetic, and maternal variance calculations.

**Usage**

```
data("chinook_bootL")
```

**Format**

A data frame with 1000 observations on the following 9 variables.

`dam.sire`, a numeric vector.

`tray`, a numeric vector.

`sire`, a numeric vector.

`dam`, a numeric vector.

`Residual`, a numeric vector.

`Total`, a numeric vector.

`additive`, a numeric vector.

`maternal`, a numeric vector.

`nonadd`, a numeric vector.

**Details**

Also includes the calculations for the amount of variance explained by position (tray), dam by sire, sire, dam, residual, and total.

**Source**

<http://link.springer.com.proxy1.lib.uwo.ca/article/10.1007>

**References**

Pitcher TE, Neff BD. 2007. Genetic quality and offspring performance in Chinook salmon: implications for supportive breeding. *Conservation Genetics* 8(3):607-616. DOI: 10.1007/s10592-006-9204-z

**Examples**

```
data(chinook_bootL)
## Extract bootstrap confidence interval
ciMANA(comp=chinook_bootL)
```

---

`chinook_boots`*Chinook salmon survival, bootstrap data*

---

**Description**

Bootstrap resampled Chinook salmon binary survival to hatch (1 is alive, 0 is dead) with the amount of additive genetic, non-additive genetic, and maternal variance calculations.

**Usage**

```
data("chinook_boots")
```

**Format**

A data frame with 1000 observations on the following 8 variables.

`dam.sire`, a numeric vector.

`sire`, a numeric vector.

`dam`, a numeric vector.

`Residual`, a numeric vector.

`Total`, a numeric vector.

`additive`, a numeric vector.

`maternal`, a numeric vector.

`nonadd`, a numeric vector.

**Details**

Also includes the calculations for the amount of variance explained by dam by sire, sire, dam, residual, and total.

**Source**

<http://link.springer.com.proxy1.lib.uwo.ca/article/10.1007>

**References**

Pitcher TE, Neff BD. 2007. Genetic quality and offspring performance in Chinook salmon: implications for supportive breeding. *Conservation Genetics* 8(3):607-616. DOI: 10.1007/s10592-006-9204-z

**Examples**

```
data(chinook_boots)
## Extract bootstrap confidence interval
ciMANA(comp=chinook_boots)
```

---

`chinook_jackL`*Chinook salmon length, jackknife data*

---

**Description**

Jackknife resampled Chinook salmon fork length (mm) at hatch with the amount of additive genetic, non-additive genetic, and maternal variance calculations. Jackknife resampling was leave-out-one.

**Usage**

```
data("chinook_jackL")
```

**Format**

A data frame with 1210 observations on the following 9 variables.

`dam.sire`, a numeric vector.

`tray`, a numeric vector.

`sire`, a numeric vector.

`dam`, a numeric vector.

`Residual`, a numeric vector.

`Total`, a numeric vector.

`additive`, a numeric vector.

`nonadd`, a numeric vector.

`maternal`, a numeric vector.

**Details**

Also includes the calculations for the amount of variance explained by position (tray), dam by sire, sire, dam, residual, and total.

**Source**

<http://link.springer.com.proxy1.lib.uwo.ca/article/10.1007>

**References**

Pitcher TE, Neff BD. 2007. Genetic quality and offspring performance in Chinook salmon: implications for supportive breeding. *Conservation Genetics* 8(3):607-616. DOI: 10.1007/s10592-006-9204-z

**Examples**

```
data(chinook_jackL)
## Extract jackknifed confidence interval
ciJack(comp=chinook_jackL,full=c(0.0000000,0.7192253,0.2029684,1.0404425))
```

---

chinook\_length

*Chinook salmon length, raw data*


---

**Description**

Raw Chinook salmon fork length (mm) at hatch for offspring produced using an 11 x 11 full factorial breeding design.

**Usage**

```
data("chinook_length")
```

**Format**

A data frame with 1210 observations on the following 8 variables.

family, a factor with levels: f1 f10 f100 f101 f102 f103 f104 f105 f106 f107 f108 f109 f11 f110 f111 f112 f113 f114 f115 f116 f117 f118 f119 f12 f120 f121 f13 f14 f15 f16 f17 f18 f19 f2 f20 f21 f22 f23 f24 f25 f26 f27 f28 f29 f3 f30 f31 f32 f33 f34 f35 f36 f37 f38 f39 f4 f40 f41 f42 f43 f44 f45 f46 f47 f48 f49 f5 f50 f51 f52 f53 f54 f55 f56 f57 f58 f59 f6 f60 f61 f62 f63 f64 f65 f66 f67 f68 f69 f7 f70 f71 f72 f73 f74 f75 f76 f77 f78 f79 f8 f80 f81 f82 f83 f84 f85 f86 f87 f88 f89 f9 f90 f91 f92 f93 f94 f95 f96 f97 f98 f99

repli, a factor with levels: r1 r2

dam, a factor with levels: d1 d10 d11 d2 d3 d4 d5 d6 d7 d8 d9

sire, a factor with levels: s1 s10 s11 s2 s3 s4 s5 s6 s7 s8 s9

tray, a factor with levels: t1 t10 t11 t12 t13 t14 t15 t16 t2 t3 t4 t5 t6 t7 t8 t9

cell, a factor with levels: 1A 1B 1C 1D 2A 2B 2C 2D 3A 3B 3C 3D 4A 4B 4C 4D

length, a numeric vector.

egg\_size, a numeric vector.

**Details**

Also includes family identity, family replicate, incubator position (tray and cell), and average female egg size (mm) information.

**Source**

<http://link.springer.com.proxy1.lib.uwo.ca/article/10.1007>

**References**

Pitcher TE, Neff BD. 2007. Genetic quality and offspring performance in Chinook salmon: implications for supportive breeding. *Conservation Genetics* 8(3):607-616. DOI: 10.1007/s10592-006-9204-z

**Examples**

```
data(chinook_length)
## Standard additive genetic, non-additive genetic, and maternal variance analysis
length_mod1<- observLmer(observ=chinook_length,dam="dam",sire="sire",response="length")
length_mod1
```

---

|                 |                                                   |
|-----------------|---------------------------------------------------|
| chinook_resampL | <i>Chinook salmon length, bootstrap resampled</i> |
|-----------------|---------------------------------------------------|

---

**Description**

Bootstrap resampled Chinook salmon fork length (mm) at hatch. Number of iterations was 5.

**Usage**

```
data("chinook_resampL")
```

**Format**

A data frame with 1210 observations on the following 30 variables.

dam1, a numeric vector  
sire1, a numeric vector  
tray1, a numeric vector  
cell1, a numeric vector  
length1, a numeric vector  
egg\_size1, a numeric vector  
dam2, a numeric vector  
sire2, a numeric vector  
tray2, a numeric vector  
cell2, a numeric vector  
length2, a numeric vector  
egg\_size2, a numeric vector  
dam3, a numeric vector  
sire3, a numeric vector  
tray3, a numeric vector  
cell3, a numeric vector  
length3, a numeric vector  
egg\_size3, a numeric vector  
dam4, a numeric vector  
sire4, a numeric vector  
tray4, a numeric vector  
cell4, a numeric vector  
length4, a numeric vector  
egg\_size4, a numeric vector  
dam5, a numeric vector  
sire5, a numeric vector  
tray5, a numeric vector  
cell5, a numeric vector  
length5, a numeric vector  
egg\_size5, a numeric vector

**Source**

Pitcher TE, Neff BD. 2007. Genetic quality and offspring performance in Chinook salmon: implications for supportive breeding. *Conservation Genetics* 8(3):607-616. DOI: 10.1007/s10592-006-9204-z

**Examples**

```
data(chinook_resampL)
#the five models
length_rcomp1<- resampLmer(resamp=chinook_resampL,dam="dam",sire="sire",response="length",
start=1,end=5) #full analysis should use 1,000 models
```

---

|                 |                                                     |
|-----------------|-----------------------------------------------------|
| chinook_resampS | <i>Chinook salmon survival, bootstrap resampled</i> |
|-----------------|-----------------------------------------------------|

---

**Description**

Bootstrap resampled Chinook salmon binary survival to hatch (1 is alive, 0 is dead). Number of iterations was 5.

**Usage**

```
data("chinook_resampS")
```

**Format**

A data frame with 36300 observations on the following 30 variables.

status1, a numeric vector  
dam1, a numeric vector  
sire1, a numeric vector  
tray1, a numeric vector  
cell1, a numeric vector  
egg\_size1, a numeric vector  
status2, a numeric vector  
dam2, a numeric vector  
sire2, a numeric vector  
tray2, a numeric vector  
cell2, a numeric vector  
egg\_size2, a numeric vector  
status3, a numeric vector  
dam3, a numeric vector  
sire3, a numeric vector  
tray3, a numeric vector  
cell3, a numeric vector  
egg\_size3, a numeric vector

status4, a numeric vector  
 dam4, a numeric vector  
 sire4, a numeric vector  
 tray4, a numeric vector  
 cell4, a numeric vector  
 egg\_size4, a numeric vector  
 status5, a numeric vector  
 dam5, a numeric vector  
 sire5, a numeric vector  
 tray5, a numeric vector  
 cell5, a numeric vector  
 egg\_size5, a numeric vector

### Source

Pitcher TE, Neff BD. 2007. Genetic quality and offspring performance in Chinook salmon: implications for supportive breeding. *Conservation Genetics* 8(3):607-616. DOI: 10.1007/s10592-006-9204-z

### Examples

```
data(chinook_resampS)
survival_rcomp<- resampGlmmer(resamp=chinook_resampS,dam="dam",sire="sire",response="status",
fam_link=binomial(logit),start=1,end=5) #full analysis should use 1,000 models
```

---

|                  |                                          |
|------------------|------------------------------------------|
| chinook_survival | <i>Chinook salmon survival, raw data</i> |
|------------------|------------------------------------------|

---

### Description

Raw Chinook salmon numbers alive and dead to hatching of offspring produced using an 11 x 11 full factorial breeding design.

### Usage

```
data("chinook_survival")
```

### Format

A data frame with 242 observations on the following 9 variables.

family, a factor with levels: f1 f10 f100 f101 f102 f103 f104 f105 f106 f107 f108 f109 f11 f110 f111 f112 f113 f114 f115 f116 f117 f118 f119 f12 f120 f121 f13 f14 f15 f16 f17 f18 f19 f2 f20 f21 f22 f23 f24 f25 f26 f27 f28 f29 f3 f30 f31 f32 f33 f34 f35 f36 f37 f38 f39 f4 f40 f41 f42 f43 f44 f45 f46 f47 f48 f49 f5 f50 f51 f52 f53 f54 f55 f56 f57 f58 f59 f6 f60 f61 f62 f63 f64 f65 f66 f67 f68 f69 f7 f70 f71 f72 f73 f74 f75 f76 f77 f78 f79 f8 f80 f81 f82 f83 f84 f85 f86 f87 f88 f89 f9 f90 f91 f92 f93 f94 f95 f96 f97 f98 f99

repli, a factor with levels: r1 r2



dam, a factor with levels: d1 d10 d11 d2 d3 d4 d5 d6 d7 d8 d9

sire, a factor with levels: s1 s10 s11 s2 s3 s4 s5 s6 s7 s8 s9

tray, a factor with levels: t1 t10 t11 t12 t13 t14 t15 t16 t2 t3 t4 t5 t6 t7 t8 t9

cell, a factor with levels: 1A 1B 1C 1D 2A 2B 2C 2D 3A 3B 3C 3D 4A 4B 4C 4D

alive, a numeric vector.

dead, a numeric vector.

egg\_size, a numeric vector.

## Details

Also includes family identity, family replicate, incubator position (tray and cell), and average female egg size (mm) information.

## Source

<http://link.springer.com.proxy1.lib.uwo.ca/article/10.1007>

## References

Pitcher TE, Neff BD. 2007. Genetic quality and offspring performance in Chinook salmon: implications for supportive breeding. *Conservation Genetics* 8(3):607-616. DOI: 10.1007/s10592-006-9204-z

## Examples

```
data(chinook_survival)
## Convert replicate-level recorded data to individual-level (binary) data
chinook_survival2<- buildBinary(dat=chinook_survival,copy=c(2:6,9),one="alive",zero="dead")

## Standard additive genetic, non-additive genetic, and maternal variance analysis
survival_mod1<- observGlmer(observ=chinook_survival2,dam="dam",sire="sire",
response="status",fam_link=binomial(logit))
survival_mod1
```

---

ciJack

*Jackknife confidence intervals*

---

## Description

Extracts jackknife confidence intervals for additive genetic, non-additive genetic, and maternal variance components.

## Usage

```
ciJack(comp, full, level = 95, rnd_r = 3, rnd_p = 1, trait = NULL)
```

**Arguments**

|                    |                                                                                                                                                                                                    |
|--------------------|----------------------------------------------------------------------------------------------------------------------------------------------------------------------------------------------------|
| <code>comp</code>  | Data frame of jackknife resampling results.                                                                                                                                                        |
| <code>full</code>  | A vector of raw observed additive, non-additive, maternal, and total variance component values for from the full observed data set, i.e. <code>c(additive, non-additive, maternal, total)</code> . |
| <code>level</code> | Confidence level, as a percentage. Default is 95.                                                                                                                                                  |
| <code>rnd_r</code> | Number of decimal places to round the confidence interval of raw values.                                                                                                                           |
| <code>rnd_p</code> | Number of decimal places to round the confidence interval of percentage values.                                                                                                                    |
| <code>trait</code> | Optional label for the phenotypic trait.                                                                                                                                                           |

**Details**

Used for jackknife resampling results produced using *JackLmer* for normal data or *JackGlmer* for non-normal data. Jackknife confidence intervals, using pseudo-values are described by Efron and Tibshirani (1993). The standard errors are calculated from the pseudo-values and the Student's *t* distribution is used to provide the lower and upper confidence values. For delete-*d* jackknife resampling, *M* degrees of freedom are used for producing the confidence interval (Martin et al. 2004):  $M = N / d$ , where *N* is the total number of observations and *d* is the number of deleted observations. That is, *M* is the number of row in the jackknife resampling results. Large values of *M*, such as 1,000, can translate to the delete-d jackknife resampling method approaching bootstrap resampling expectations (Efron & Tibshirani 1993).

**Value**

Prints a data frame containing the lower, median, and upper values of the jackknife confidence interval for additive genetic, non-additive genetic, and maternal variance components. Values are presented as raw and percentages of the total variance value within each row.

**References**

- Efron B, Tibshirani R. 1993. An introduction to the Bootstrap. Chapman and Hall, New York.
- Martin, H., Westad, F. & Martens, H. (2004). Improved Jackknife Variance Estimates of Bilinear Model Parameters. COMPSTAT 2004 – Proceedings in Computational Statistics 16th Symposium Held in Prague, Czech Republic, 2004 (ed J. Antoch), pp. 261-275. Physica-Verlag HD, Heidelberg.

**See Also**

[ciJack2](#), [ciJack3](#)

**Examples**

```
data(chinook_jackL) #Chinook salmon offspring length, delete-one jackknife
ciJack(chinook_jackL,c(0.000000,0.7192253,0.2029684,1.0404425))
```

---

ciJack2

*Jackknife confidence intervals 2*


---

### Description

Extracts jackknife confidence intervals for additive genetic, non-additive genetic, and maternal variance components. Also extracts intervals for optional position and block variance components.

### Usage

```
ciJack2(comp, full, level = 95, rnd_r = 3, rnd_p = 1, position = NULL, block = NULL,
trait = NULL)
```

### Arguments

|          |                                                                                                                                                                                                                                                                                                        |
|----------|--------------------------------------------------------------------------------------------------------------------------------------------------------------------------------------------------------------------------------------------------------------------------------------------------------|
| comp     | Data frame of jackknife resampling results.                                                                                                                                                                                                                                                            |
| full     | A vector of raw observed additive, non-additive, maternal, and total variance component values for from the full observed data set, i.e. <code>c(additive, non-additive, maternal, total, position/block)</code> . If there is a position and a block <code>c(..., maternal, position, block)</code> . |
| level    | Confidence level, as a percentage. Default is 95.                                                                                                                                                                                                                                                      |
| rnd_r    | Number of decimal places to round the confidence interval of raw values.                                                                                                                                                                                                                               |
| rnd_p    | Number of decimal places to round the confidence interval of percentage values.                                                                                                                                                                                                                        |
| position | Optional column name containing position factor information.                                                                                                                                                                                                                                           |
| block    | Optional column name containing block factor information.                                                                                                                                                                                                                                              |
| trait    | Optional label for the phenotypic trait.                                                                                                                                                                                                                                                               |

### Details

Used for jackknife resampling results produced using *JackLmer2* for normal data or *JackGlmer2* for non-normal data. Jackknife confidence intervals, using pseudo-values are described by Efron and Tibshirani (1993). The standard errors are calculated from the pseudo-values and the Student's *t* distribution is used to provide the lower and upper confidence values. For delete-*d* jackknife resampling, *M* degrees of freedom are used for producing the confidence interval (Martin et al. 2004):  $M = N / d$ , where *N* is the total number of observations and *d* is the number of deleted observations. That is, *M* is the number of row in the jackknife resampling results. Large values of *M*, such as 1,000, can translate to the delete-*d* jackknife resampling method approaching bootstrap resampling expectations (Efron & Tibshirani 1993).

### Value

Prints a data frame containing the lower, median, and upper values of the jackknife confidence interval for additive genetic, non-additive genetic, maternal variance components, and optional position and/or block variance components. Values are presented as raw and percentages of the total variance value within each row.

## References

- Efron B, Tibshirani R. 1993. An introduction to the Bootstrap. Chapman and Hall, New York.
- Martin, H., Westad, F. & Martens, H. (2004). Improved Jackknife Variance Estimates of Bilinear Model Parameters. COMPSTAT 2004 – Proceedings in Computational Statistics 16th Symposium Held in Prague, Czech Republic, 2004 (ed J. Antoch), pp. 261-275. Physica-Verlag HD, Heidelberg.

## See Also

[ciJack](#), [ciJack3](#)

## Examples

```
data(chinook_jackL) #Chinook salmon offspring length, delete-one jackknife
ciJack2(chinook_jackL,c(0.000000,0.7192253,0.2029684,1.0404425,0.1077423),position="tray")
```

---

```
ciJack3
```

*Jackknife confidence intervals 3*

---

## Description

Extracts jackknife confidence intervals for additive genetic, non-additive genetic, and maternal variance components. Also extracts intervals for additional fixed and random effects.

## Usage

```
ciJack3(comp, full, remain = NULL, level = 95, rnd_r = 3, rnd_p = 1, trait = NULL)
```

## Arguments

|                     |                                                                                                                                                                                                                                                                                                                                                                            |
|---------------------|----------------------------------------------------------------------------------------------------------------------------------------------------------------------------------------------------------------------------------------------------------------------------------------------------------------------------------------------------------------------------|
| <code>comp</code>   | Data frame of jackknife resampling results                                                                                                                                                                                                                                                                                                                                 |
| <code>full</code>   | A vector of raw observed additive, non-additive, maternal, and total variance component values for from the full observed data set, i.e. <code>c(additive, non-additive, maternal, total)</code> . Followed by any other components in the order of the vector <i>remain</i> , i.e. <code>c(additive, non-additive, maternal, total, component1, component2, ...)</code> . |
| <code>remain</code> | Vector of column names for additional effects                                                                                                                                                                                                                                                                                                                              |
| <code>level</code>  | Confidence level, as a percentage. Default is 95.                                                                                                                                                                                                                                                                                                                          |
| <code>rnd_r</code>  | Number of decimal places to round the confidence interval of raw values.                                                                                                                                                                                                                                                                                                   |
| <code>rnd_p</code>  | Number of decimal places to round the confidence interval of percentage values.                                                                                                                                                                                                                                                                                            |
| <code>trait</code>  | Optional label for the phenotypic trait.                                                                                                                                                                                                                                                                                                                                   |

## Details

Used for jackknife resampling results produced using *JackLmer3* for normal data or *JackGlm3* for non-normal data. Jackknife confidence intervals, using pseudo-values are described by Efron and Tibshirani (1993). The standard errors are calculated from the pseudo-values and the Student's *t* distribution is used to provide the lower and upper confidence values. For delete-*d* jackknife resampling, *M* degrees of freedom are used for producing the confidence interval (Martin et al. 2004):  $M = N / d$ , where *N* is the total number of observations and *d* is the number of deleted observations. That is, *M* is the number of row in the jackknife resampling results. Large values of *M*, such as 1,000, can translate to the delete-*d* jackknife resampling method approaching bootstrap resampling expectations (Efron & Tibshirani 1993).

**Value**

Prints a data frame containing the lower, median, and upper values of the jackknife confidence interval for additive genetic, non-additive genetic, maternal variance components, and any additional fixed effect and random effect variance components. Values are presented as raw and percentages of the total variance value within each row.

**References**

Efron B, Tibshirani R. 1993. An introduction to the Bootstrap. Chapman and Hall, New York.

Martin, H., Westad, F. & Martens, H. (2004). Improved Jackknife Variance Estimates of Bilinear Model Parameters. COMPSTAT 2004 – Proceedings in Computational Statistics 16th Symposium Held in Prague, Czech Republic, 2004 (ed J. Antoch), pp. 261-275. Physica-Verlag HD, Heidelberg.

**See Also**

[ciJack](#), [ciJack2](#)

**Examples**

```
data(chinook_jackL) #Chinook salmon offspring length, delete-one jackknife
ciJack3(chinook_jackL,c(0.0000000,0.7192253,0.2029684,1.0404425,0.1077423,0.5499255),
remain=c("tray","Residual"))
```

---

ciMANA

*Bootstrap confidence intervals*


---

**Description**

Extracts bootstrap-*t* confidence intervals for additive genetic, non-additive genetic, and maternal variance components.

**Usage**

```
ciMANA(comp, level = 95, rnd_r = 3, rnd_p = 1, bias = NULL, accel = NULL, trait = NULL)
```

**Arguments**

|       |                                                                                                                                                                       |
|-------|-----------------------------------------------------------------------------------------------------------------------------------------------------------------------|
| comp  | Data frame of bootstrap resampling results.                                                                                                                           |
| level | Confidence level, as a percentage. Default is 95.                                                                                                                     |
| rnd_r | Number of decimal places to round the confidence interval of raw values.                                                                                              |
| rnd_p | Number of decimal places to round the confidence interval of percentage values.                                                                                       |
| bias  | Optional vector of raw observed additive, non-additive, and maternal, variance component values for bias correction, i.e. c(additive, non-additive, maternal, total). |
| accel | Optional data frame of jackknifed data model results for acceleration correction.                                                                                     |
| trait | Optional label for the phenotypic trait.                                                                                                                              |

**Details**

Used for bootstrap resampling results produced using *resampLmer* for normal data or *resampGlmer* for non-normal data. Bootstrap-*t* confidence intervals, including bias and acceleration correction methods are described by Efron and Tibshirani (1993). Jackknife data model results for acceleration correction can be produced using *JackLmer*, for normal data or *JackGlmer* for non-normal data. The 'bias fail' warning is if the bias calculation is Inf or -Inf, e.g. *bias* contains a zero value, so the uncorrected confidence interval is displayed.

**Value**

Prints a data frame containing the lower, median, and upper values of the bootstrap-*t* confidence interval for additive genetic, non-additive genetic, and maternal variance components. Values are presented as raw and percentages of the total variance value within each row.

**References**

Efron B, Tibshirani R. 1993. An introduction to the Bootstrap. Chapman and Hall, New York.

**See Also**

[ciMANA2](#), [ciMANA3](#)

**Examples**

```
#Import bootstrap resampled data model results
data(chinook_bootL) #Chinook salmon offspring length

#Extract un-corrected confidence interval
ciMANA(comp=chinook_bootL)

#Extract bias corrected confidence interval
ciMANA(comp=chinook_bootL,bias=c(0.0000000,0.7192253,0.2029684))
#see details for 'bias' fail

#Extract bias and accelerated corrected confidence interval
#Import jackknife resampled data model results
data(chinook_jackL)
#
ciMANA(comp=chinook_bootL,bias=c(0.0000000,0.7192253,0.2029684),accel=chinook_jackL)
#see details for 'bias' fail
```

---

ciMANA2

*Bootstrap confidence intervals 2*


---

**Description**

Extracts bootstrap-*t* confidence intervals for additive genetic, non-additive genetic, and maternal variance components. Also extracts intervals for optional position and block variance components.

**Usage**

```
ciMANA2(comp, level = 95, rnd_r = 3, rnd_p = 1, position = NULL, block = NULL,
bias = NULL, accel = NULL, trait = NULL)
```

**Arguments**

|                       |                                                                                                                                                                                                                                                                                                    |
|-----------------------|----------------------------------------------------------------------------------------------------------------------------------------------------------------------------------------------------------------------------------------------------------------------------------------------------|
| <code>comp</code>     | Data frame of bootstrap resampling results.                                                                                                                                                                                                                                                        |
| <code>level</code>    | Confidence level, as a percentage. Default is 95.                                                                                                                                                                                                                                                  |
| <code>rnd_r</code>    | Number of decimal places to round the confidence interval of raw values.                                                                                                                                                                                                                           |
| <code>rnd_p</code>    | Number of decimal places to round the confidence interval of percentage values.                                                                                                                                                                                                                    |
| <code>position</code> | Optional column name containing position factor information.                                                                                                                                                                                                                                       |
| <code>block</code>    | Optional column name containing block factor information.                                                                                                                                                                                                                                          |
| <code>bias</code>     | Optional vector of raw observed additive, non-additive, maternal, position and/or block variance component values for bias correction, i.e. <code>c(additive, non-additive, maternal, position/block)</code> . If there is a position and a block <code>c(..., maternal, position, block)</code> . |
| <code>accel</code>    | Optional data frame of jackknifed data model results for acceleration correction.                                                                                                                                                                                                                  |
| <code>trait</code>    | Optional label for the phenotypic trait.                                                                                                                                                                                                                                                           |

**Details**

Used for bootstrap resampling results produced using *resampLmer2* for normal data or *resampGlmr2* for non-normal data. Bootstrap-*t* confidence intervals, including bias and acceleration correction methods are described by Efron and Tibshirani (1993). Jackknife data model results for acceleration correction can be produced using *JackLmer2*, for normal data or *JackGlmr2* for non-normal data. The 'bias fail' warning is if the bias calculation is Inf or -Inf, e.g. *bias* contains a zero value, so the uncorrected confidence interval is displayed.

**Value**

Prints a data frame containing the lower, median, and upper values of the bootstrap-*t* confidence interval for additive genetic, non-additive genetic, maternal, and optional position and/or block variance components. Values are presented as raw and percentages of the total variance value within each row.

**References**

Efron B, Tibshirani R. 1993. An introduction to the Bootstrap. Chapman and Hall, New York.

**See Also**

[ciMANA](#), [ciMANA3](#)

**Examples**

```
#Import bootstrap resampled data model results
data(chinook_bootL) #Chinook salmon offspring length

#Extract un-corrected confidence interval
ciMANA2(comp=chinook_bootL,position="tray")
```

```
#Extract bias corrected confidence interval
ciMANA2(comp=chinook_bootL,bias=c(0.0000000,0.7192253,0.2029684,0.1077423),position="tray")
#see details for 'bias' fail

#Extract bias and accelerated corrected confidence interval
#Import jackknife resampled data model results
data(chinook_jackL)
#
ciMANA2(comp=chinook_bootL,bias=c(0.0000000,0.7192253,0.2029684,0.1077423),
accel=chinook_jackL,position="tray")
#see details for 'bias' fail
```

---

ciMANA3

*Bootstrap confidence intervals 3*


---

## Description

Extracts bootstrap-*t* confidence intervals for additive genetic, non-additive genetic, and maternal variance components. Also extracts intervals for additional fixed and random effects.

## Usage

```
ciMANA3(comp, level = 95, rnd_r = 3, rnd_p = 1, bias = NULL, accel = NULL,
remain = NULL, trait = NULL)
```

## Arguments

|        |                                                                                                                                                                                                                                                                                |
|--------|--------------------------------------------------------------------------------------------------------------------------------------------------------------------------------------------------------------------------------------------------------------------------------|
| comp   | Data frame of bootstrap resampling results.                                                                                                                                                                                                                                    |
| level  | Confidence level, as a percentage. Default is 95.                                                                                                                                                                                                                              |
| rnd_r  | Number of decimal places to round the confidence interval of raw values.                                                                                                                                                                                                       |
| rnd_p  | Number of decimal places to round the confidence interval of percentage values.                                                                                                                                                                                                |
| bias   | Optional vector of raw observed additive, non-additive, and maternal variance components for bias correction. Followed by any other components in the order of the vector <i>remain</i> , i.e. <code>c(additive, non-additive, maternal, component1, component2, ...)</code> . |
| accel  | Optional data frame of jackknifed data model results for acceleration correction.                                                                                                                                                                                              |
| remain | Vector of column names for additional effects.                                                                                                                                                                                                                                 |
| trait  | Optional label for the phenotypic trait.                                                                                                                                                                                                                                       |

## Details

Used for bootstrap resampling results produced using *resampLmer3* for normal data or *resampGlm3* for non-normal data. Bootstrap-*t* confidence intervals, including bias and acceleration correction methods are described by Efron and Tibshirani (1993). Jackknife data model results for acceleration correction can be produced using *JackLmer3*, for normal data or *JackGlm3* for non-normal data. The 'bias fail' warning is if the bias calculation is Inf or -Inf, e.g. *bias* contains a zero value, so the uncorrected confidence interval is displayed.



**Value**

Prints a data frame containing the lower, median, and upper values of the bootstrap-*t* confidence interval for additive genetic, non-additive genetic, maternal, and any additional fixed effect and random effect variance components. Values are presented as raw and percentages of the total variance value within each row.

**References**

Efron B, Tibshirani R. 1993. An introduction to the Bootstrap. Chapman and Hall, New York.

**See Also**

[ciMANA](#), [ciMANA2](#)

**Examples**

```
#Import bootstrap resampled data model results
data(chinook_bootL) #Chinook salmon offspring length

#Extract un-corrected confidence interval
ciMANA3(comp=chinook_bootL,remain=c("tray","Residual"))

#Extract bias corrected confidence interval
ciMANA3(comp=chinook_bootL,bias=c(0.0000000,0.7192253,0.2029684,0.1077423,0.5499255),
remain=c("tray","Residual"))
#see details for 'bias' fail

#Extract bias and accelerated corrected confidence interval
#Import jackknife resampled data model results
data(chinook_jackL)
#
ciMANA3(comp=chinook_bootL,bias=c(0.0000000,0.7192253,0.2029684,0.1077423,0.5499255),
accel=chinook_jackL,remain=c("tray","Residual"))
```

---

JackGlmer

*Jackknife components for non-normal data*

---

**Description**

Extracts additive genetic, non-additive genetic, and maternal variance components from a linear mixed-effect model using the *lmer* function of the *lme4* package. Model random effects are dam, sire, and dam by sire.

**Usage**

```
JackGlmer(observ, dam, sire, response, fam_link, quasi = F, size = 1, first = NULL)
```

## Arguments

|          |                                                                                                                                                                                                                                                                                                        |
|----------|--------------------------------------------------------------------------------------------------------------------------------------------------------------------------------------------------------------------------------------------------------------------------------------------------------|
| observ   | Data frame of observed data.                                                                                                                                                                                                                                                                           |
| dam      | Column name containing dam(female) parent identity information.                                                                                                                                                                                                                                        |
| sire     | Column name containing sire(male) parent identity information.                                                                                                                                                                                                                                         |
| response | Column name containing the offspring (response) phenotype values.                                                                                                                                                                                                                                      |
| fam_link | The family and link in family(link) format. Supported options are binomial(logit), binomial(probit), poisson(log), and poisson (sqrt).                                                                                                                                                                 |
| quasi    | Incorporate overdispersion or quasi-error structure.                                                                                                                                                                                                                                                   |
| size     | Default is 1 for delete-one jackknife resampling. If $size > 1$ , delete- $d$ jackknife resampling occurs removing a block $d$ equal to $size$ .                                                                                                                                                       |
| first    | Number of initial sub-samples to run. Useful for examining if there is variation among sub-samples before jackknife resampling the entire data set. There can be little variation for delete-one jackknife resampling with large data sets, and delete- $d$ jackknife resampling should be considered. |

## Details

Uses delete-one jackknife resampling (Efron & Tibshirani 1993, p. 141-145). For the option of delete- $d$  jackknife resampling, the rows of the observed data frame are shuffled and a block of observations of size  $d$  is deleted sequentially. Laplace approximation parameter estimation is used, which is a true likelihood method (Bolker et al. 2009). For the overdispersion option, an observation-level random effect is added to the model (Atkins et al. 2013). Extracts the dam, sire, dam by sire variance components. The residual variance component for the *fam\_links* are described by Nakagawa and Schielzeth (2010, 2013). Calculates the total variance component. Calculates the additive genetic, non-additive genetic, and maternal variance components (see Lynch and Walsh 1998, p. 603).

## Value

A data frame with columns containing the raw variance components for dam, sire, dam by sire, residual, total, additive genetic, non-additive genetic, and maternal. The number of rows in the data frame matches the total number of observations ( $N$ ) for delete-one jackknife resampling or  $M$  groups for delete- $d$  jackknife resampling to the lowest integer. Each row represents a deleted single observation or deleted  $d$  observations group.

## Note

The Laplace approximation is used because there were fewer disadvantages relative to penalized quasi-likelihood and Gauss-Hermite quadrature parameter estimation (Bolker et al. 2009). That is, penalized quasi-likelihood is not recommended for count responses with means less than 5 and binary responses with less than 5 successes per group. Gauss-Hermite quadrature is not recommended for more than two or three random effects because of the rapidly declining analytical speed with the increasing number of random effects.

## References

Atkins DC, Baldwin SA, Zheng C, Gallop RJ, Neighbors C. 2013. A tutorial on count regression and zero-altered count models for longitudinal substance use data. *Psychology of Addictive Behaviors* 27(1): 166-177. DOI: 10.1037/a0029508

Bolker BM, Brooks ME, Clark CJ, Geange SW, Poulsen JR, Stevens MHH, White J-SS. 2009. Generalized linear mixed models: a practical guide for ecology and evolution. *Trends in Ecology and Evolution* 24(3): 127-135. DOI: 10.1016/j.tree.2008.10.008

Efron B, Tibshirani R. 1993. *An introduction to the Bootstrap*. Chapman and Hall, New York.

Lynch M, Walsh B. 1998. *Genetics and Analysis of Quantitative Traits*. Sinauer Associates, Massachusetts.

Nakagawa S, Schielzeth H. 2010. Repeatability for Gaussian and non-Gaussian data: a practical guide for biologists. *Biological Reviews* 85(4): 935-956. DOI: 10.1111/j.1469-185X.2010.00141.x

Nakagawa S, Schielzeth H. 2013. A general and simple method for obtaining R<sup>2</sup> from generalized linear mixed-effects models. *Methods in Ecology and Evolution* 4(2): 133-142. DOI: 10.1111/j.2041-210x.2012.00261.x

## See Also

[JackGlmer2](#), [JackGlmer3](#)

## Examples

```
data(chinook_survival) #Chinook salmon offspring survival
## Convert replicate-level recorded data to individual-level (binary) data
chinook_survival2<- buildBinary(dat=chinook_survival,copy=c(1:6,9),one="alive",zero="dead")

#Delete-one
#survival_jack1<- JackGlmer(observ=chinook_survival2,dam="dam",sire="sire",
#response="status",fam_link=binomial(logit))
survival_jack1<- JackGlmer(observ=chinook_survival2,dam="dam",sire="sire",
response="status",fam_link=binomial(logit),first=2) #first 2, a few minutes

#Delete-d, d=36
#survival_jack1.2<- JackGlmer(observ=chinook_survival2,dam="dam",sire="sire",
#response="status",fam_link=binomial(logit),size=36)
survival_jack1.2<- JackGlmer(observ=chinook_survival2,dam="dam",sire="sire",
response="status",fam_link=binomial(logit),size=36,first=2) #first 2, a few minutes
```

---

JackGlmer2

*Jackknife components for non-normal data 2*

---

## Description

Extracts additive genetic, non-additive genetic, and maternal variance components from a linear mixed-effect model using the *lmer* function of the *lme4* package. Model random effects are dam, sire, and dam by sire. Options to include one random position and/or one random block effect(s).

## Usage

```
JackGlmer2(observ, dam, sire, response, fam_link, position = NULL, block = NULL,
quasi = F, size = 1, first = NULL)
```

## Arguments

|          |                                                                                                                                                                                                                                                                                                        |
|----------|--------------------------------------------------------------------------------------------------------------------------------------------------------------------------------------------------------------------------------------------------------------------------------------------------------|
| observ   | Data frame of observed data.                                                                                                                                                                                                                                                                           |
| dam      | Column name containing dam(female) parent identity information.                                                                                                                                                                                                                                        |
| sire     | Column name containing sire(male) parent identity information.                                                                                                                                                                                                                                         |
| response | Column name containing the offspring (response) phenotype values.                                                                                                                                                                                                                                      |
| fam_link | The family and link in family(link) format. Supported options are binomial(logit), binomial(probit), poisson(log), and poisson (sqrt).                                                                                                                                                                 |
| position | Optional column name containing position factor information.                                                                                                                                                                                                                                           |
| block    | Optional column name containing block factor information.                                                                                                                                                                                                                                              |
| quasi    | Incorporate overdispersion or quasi-error structure.                                                                                                                                                                                                                                                   |
| size     | Default is 1 for delete-one jackknife resampling. If $size > 1$ , delete- $d$ jackknife resampling occurs removing a block $d$ equal to $size$ .                                                                                                                                                       |
| first    | Number of initial sub-samples to run. Useful for examining if there is variation among sub-samples before jackknife resampling the entire data set. There can be little variation for delete-one jackknife resampling with large data sets, and delete- $d$ jackknife resampling should be considered. |

## Details

Uses delete-one jackknife resampling (Efron & Tibshirani 1993, p. 141-145). For the option of delete- $d$  jackknife resampling, the rows of the observed data frame are shuffled and a block of observations of size  $d$  is deleted sequentially. Laplace approximation parameter estimation is used, which is a true likelihood method (Bolker et al. 2009). For the overdispersion option, an observation-level random effect is added to the model (Atkins et al. 2013). Extracts the dam, sire, dam by sire variance components. Extracts optional position and block variance components. The residual variance component for the *fam\_links* are described by Nakagawa and Schielzeth (2010, 2013). Calculates the total variance component. Calculates the additive genetic, non-additive genetic, and maternal variance components (see Lynch and Walsh 1998, p. 603).

## Value

A data frame with columns containing the raw variance components for dam, sire, dam by sire, residual, total, additive genetic, non-additive genetic, and maternal. Also columns containing the raw variance components for the options of position and/or block. The number of rows in the data frame matches the total number of observations ( $N$ ) for delete-one jackknife resampling or  $M$  groups for delete- $d$  jackknife resampling to the lowest integer. Each row represents a deleted single observation or deleted  $d$  observations group.

## Note

The Laplace approximation is used because there were fewer disadvantages relative to penalized quasi-likelihood and Gauss-Hermite quadrature parameter estimation (Bolker et al. 2009). That is, penalized quasi-likelihood is not recommended for count responses with means less than 5 and binary responses with less than 5 successes per group. Gauss-Hermite quadrature is not recommended for more than two or three random effects because of the rapidly declining analytical speed with the increasing number of random effects.

## References

- Atkins DC, Baldwin SA, Zheng C, Gallop RJ, Neighbors C. 2013. A tutorial on count regression and zero-altered count models for longitudinal substance use data. *Psychology of Addictive Behaviors* 27(1): 166-177. DOI: 10.1037/a0029508
- Bolker BM, Brooks ME, Clark CJ, Geange SW, Poulsen JR, Stevens MHH, White J-SS. 2009. Generalized linear mixed models: a practical guide for ecology and evolution. *Trends in Ecology and Evolution* 24(3): 127-135. DOI: 10.1016/j.tree.2008.10.008
- Efron B, Tibshirani R. 1993. *An introduction to the Bootstrap*. Chapman and Hall, New York.
- Lynch M, Walsh B. 1998. *Genetics and Analysis of Quantitative Traits*. Sinauer Associates, Massachusetts.
- Nakagawa S, Schielzeth H. 2010. Repeatability for Gaussian and non-Gaussian data: a practical guide for biologists. *Biological Reviews* 85(4): 935-956. DOI: 10.1111/j.1469-185X.2010.00141.x
- Nakagawa S, Schielzeth H. 2013. A general and simple method for obtaining R<sup>2</sup> from generalized linear mixed-effects models. *Methods in Ecology and Evolution* 4(2): 133-142. DOI: 10.1111/j.2041-210x.2012.00261.x

## See Also

[JackGlmer](#), [JackGlmer3](#)

## Examples

```
data(chinook_survival) #Chinook salmon offspring survival
## Convert replicate-level recorded data to individual-level (binary) data
chinook_survival2<- buildBinary(dat=chinook_survival,copy=c(1:6,9),one="alive",zero="dead")

#Delete-one
#survival_jack2<- JackGlmer2(observ=chinook_survival2,dam="dam",sire="sire",
#response="status",fam_link=binomial(logit),position="tray")
survival_jack2<- JackGlmer2(observ=chinook_survival2,dam="dam",sire="sire",
response="status",fam_link=binomial(logit),position="tray",first=2)
#first 2, a few minutes

#Delete-d, d=36
#survival_jack2.2<- JackGlmer2(observ=chinook_survival2,dam="dam",sire="sire",
#response="status",fam_link=binomial(logit),position="tray",size=36)
survival_jack2.2<- JackGlmer2(observ=chinook_survival2,dam="dam",sire="sire",
response="status",fam_link=binomial(logit),position="tray",size=36,first=2)
#first 2, a few minutes
```

## Description

Extracts additive genetic, non-additive genetic, and maternal variance components from a linear mixed-effect model using the *lmer* function of the *lme4* package. Model random effects are dam, sire, dam by sire, and any additional fixed and/or random effects.

**Usage**

```
JackGlmer3(observ, dam, sire, response, fam_link, remain, quasi = F, size = 1,
first = NULL)
```

**Arguments**

|                       |                                                                                                                                                                                                                                                                                                             |
|-----------------------|-------------------------------------------------------------------------------------------------------------------------------------------------------------------------------------------------------------------------------------------------------------------------------------------------------------|
| <code>observ</code>   | Data frame of observed data.                                                                                                                                                                                                                                                                                |
| <code>dam</code>      | Column name containing dam(female) parent identity information.                                                                                                                                                                                                                                             |
| <code>sire</code>     | Column name containing sire(male) parent identity information.                                                                                                                                                                                                                                              |
| <code>response</code> | Column name containing the offspring (response) phenotype values.                                                                                                                                                                                                                                           |
| <code>fam_link</code> | The family and link in family(link) format. Supported options are binomial(logit), binomial(probit), poisson(log), and poisson (sqrt).                                                                                                                                                                      |
| <code>remain</code>   | Remaining formula with # using <i>lme4</i> package formula.                                                                                                                                                                                                                                                 |
| <code>quasi</code>    | Incorporate overdispersion or quasi-error structure.                                                                                                                                                                                                                                                        |
| <code>size</code>     | Default is 1 for delete-one jackknife resampling. If <i>size</i> > 1, delete- <i>d</i> jackknife resampling occurs removing a block <i>d</i> equal to <i>size</i> .                                                                                                                                         |
| <code>first</code>    | Number of initial sub-samples to run. Useful for examining if there is variation among sub-samples before jackknife resampling the entire data set. There can be little variation for delete-one jackknife resampling with large data sets, and delete- <i>d</i> jackknife resampling should be considered. |

**Details**

Uses delete-one jackknife resampling (Efron & Tibshirani 1993, p. 141-145). For the option of delete-*d* jackknife resampling, the rows of the observed data frame are shuffled and a block of observations of size *d* is deleted sequentially. Laplace approximation parameter estimation is used, which is a true likelihood method (Bolker et al. 2009). For the overdispersion option, an observation-level random effect is added to the model (Atkins et al. 2013). Extracts the dam, sire, dam, and dam by sire variance components. Extracts any additional fixed effect and random effect variance components. The fixed-effect variance component is as a single group using the method described by Nakagawa and Schielzeth (2013). The residual variance component for the *fam\_links* are described by Nakagawa and Schielzeth (2010, 2013). Calculates the total variance component. Calculates the additive genetic, non-additive genetic, and maternal variance components (see Lynch and Walsh 1998, p. 603).

**Value**

A data frame with columns containing the raw variance components for dam, sire, dam by sire, residual, total, additive genetic, non-additive genetic, and maternal. Also columns containing the raw variance components for remaining formula components. The number of rows in the data frame matches the total number of observations (*N*) for delete-one jackknife resampling or *M* groups for delete-*d* jackknife resampling to the lowest integer. Each row represents a deleted single observation or deleted *d* observations group.

**Note**

The Laplace approximation is used because there were fewer disadvantages relative to penalized quasi-likelihood and Gauss-Hermite quadrature parameter estimation (Bolker et al. 2009). That is, penalized quasi-likelihood is not recommended for count responses with means less than 5 and

binary responses with less than 5 successes per group. Gauss-Hermite quadrature is not recommended for more than two or three random effects because of the rapidly declining analytical speed with the increasing number of random effects.

## References

- Atkins DC, Baldwin SA, Zheng C, Gallop RJ, Neighbors C. 2013. A tutorial on count regression and zero-altered count models for longitudinal substance use data. *Psychology of Addictive Behaviors* 27(1): 166-177. DOI: 10.1037/a0029508
- Bolker BM, Brooks ME, Clark CJ, Geange SW, Poulsen JR, Stevens MHH, White J-SS. 2009. Generalized linear mixed models: a practical guide for ecology and evolution. *Trends in Ecology and Evolution* 24(3): 127-135. DOI: 10.1016/j.tree.2008.10.008
- Efron B, Tibshirani R. 1993. *An introduction to the Bootstrap*. Chapman and Hall, New York.
- Lynch M, Walsh B. 1998. *Genetics and Analysis of Quantitative Traits*. Sinauer Associates, Massachusetts.
- Nakagawa S, Schielzeth H. 2010. Repeatability for Gaussian and non-Gaussian data: a practical guide for biologists. *Biological Reviews* 85(4): 935-956. DOI: 10.1111/j.1469-185X.2010.00141.x
- Nakagawa S, Schielzeth H. 2013. A general and simple method for obtaining R<sup>2</sup> from generalized linear mixed-effects models. *Methods in Ecology and Evolution* 4(2): 133-142. DOI: 10.1111/j.2041-210x.2012.00261.x

## See Also

[JackGlmr](#), [JackGlmr2](#)

## Examples

```
data(chinook_survival) #Chinook salmon offspring survival
## Convert replicate-level recorded data to individual-level (binary) data
chinook_survival2<- buildBinary(dat=chinook_survival,copy=c(1:6,9),one="alive",zero="dead")

#Delete-one
#survival_jack3<- JackGlmr3(observ=chinook_survival2,dam="dam",sire="sire",
#response="status",fam_link=binomial(logit),remain="egg_size + (1|tray)")
survival_jack3<- JackGlmr3(observ=chinook_survival2,dam="dam",sire="sire",
response="status",fam_link=binomial(logit),remain="egg_size + (1|tray)",first=2)
#first 2, a few minutes

#Delete-d, d=36
#survival_jack3.2<- JackGlmr3(observ=chinook_survival2,dam="dam",sire="sire",
#response="status",fam_link=binomial(logit),remain="egg_size + (1|tray)",size=36)
survival_jack3.2<- JackGlmr3(observ=chinook_survival2,dam="dam",sire="sire",
response="status",fam_link=binomial(logit),remain="egg_size + (1|tray)",size=36,first=2)
#first 2, a few minutes
```

## Description

Extracts additive genetic, non-additive genetic, and maternal variance components from a linear mixed-effect model using the *lmer* function of the *lme4* package. Model random effects are dam, sire, and dam by sire.

## Usage

```
JackLmer(observ, dam, sire, response, ml = F, size = 1, first = NULL)
```

## Arguments

|          |                                                                                                                                                                                                                                                                                                             |
|----------|-------------------------------------------------------------------------------------------------------------------------------------------------------------------------------------------------------------------------------------------------------------------------------------------------------------|
| observ   | Data frame of observed data.                                                                                                                                                                                                                                                                                |
| dam      | Column name containing dam(female) parent identity information.                                                                                                                                                                                                                                             |
| sire     | Column name containing sire(male) parent identity information.                                                                                                                                                                                                                                              |
| response | Column name containing the offspring (response) phenotype values.                                                                                                                                                                                                                                           |
| ml       | Default is FALSE for restricted maximum likelihood. Change to TRUE for maximum likelihood.                                                                                                                                                                                                                  |
| size     | Default is 1 for delete-one jackknife resampling. If <i>size</i> > 1, delete- <i>d</i> jackknife resampling occurs removing a block <i>d</i> equal to <i>size</i> .                                                                                                                                         |
| first    | Number of initial sub-samples to run. Useful for examining if there is variation among sub-samples before jackknife resampling the entire data set. There can be little variation for delete-one jackknife resampling with large data sets, and delete- <i>d</i> jackknife resampling should be considered. |

## Details

Uses delete-one jackknife resampling (Efron & Tibshirani 1993, p. 141-145). For the option of delete-*d* jackknife resampling, the rows of the observed data frame are shuffled and a block of observations of size *d* is deleted sequentially. Extracts the dam, sire, dam, dam by sire, and residual variance components. Calculates the total variance component. Calculates the additive genetic, non-additive genetic, and maternal variance components (see Lynch and Walsh 1998, p. 603).

## Value

A data frame with columns containing the raw variance components for dam, sire, dam by sire, residual, total, additive genetic, non-additive genetic, and maternal. The number of rows in the data frame matches the total number of observations (*N*) for delete-one jackknife resampling or *M* groups for delete-*d* jackknife resampling to the lowest integer. Each row represents a deleted single observation or deleted *d* observations group.

## Note

Maximum likelihood (ML) estimates the parameters that maximize the likelihood of the observed data and has the advantage of using all the data and accounting for non-independence (Lynch and Walsh 1998, p. 779; Bolker et al. 2009). On the other hand, ML has the disadvantage of assuming that all fixed effects are known without error, producing a downward bias in the estimation of the residual variance component. This bias can be large if there are lots of fixed effects, especially if sample sizes are small. Restricted maximum likelihood (REML) has the advantage of not assuming the fixed effects are known and averages over the uncertainty, so there can be less bias in the estimation of the residual variance component. However, REML only maximizes a portion of the likelihood to estimate the effect parameters, but is the preferred method for analyzing large data sets with complex structure.



## References

- Efron B, Tibshirani R. 1993. An introduction to the Bootstrap. Chapman and Hall, New York.
- Lynch M, Walsh B. 1998. Genetics and Analysis of Quantitative Traits. Sinauer Associates, Massachusetts.

## See Also

[JackLmer2](#), [JackLmer3](#)

## Examples

```
data(chinook_length) #Chinook salmon offspring length

#Delete-one
#length_jack1<- JackLmer(observ=chinook_length,dam="dam",sire="sire",response="length")
length_jack1<- JackLmer(observ=chinook_length,dam="dam",sire="sire",response="length",
first=2) #first 2

#Delete-d, d=5
#length_jack1.2<- JackLmer(observ=chinook_length,dam="dam",sire="sire",response="length",
#size=5)
length_jack1.2<- JackLmer(observ=chinook_length,dam="dam",sire="sire",response="length",
size=5,first=2) #first 2
```

---

JackLmer2

*Jackknife components for normal data 2*

---

## Description

Extracts additive genetic, non-additive genetic, and maternal variance components from a linear mixed-effect model using the *lmer* function of the *lme4* package. Model random effects are dam, sire, and dam by sire. Options to include one random position and/or one random block effect(s).

## Usage

```
JackLmer2(observ, dam, sire, response, position = NULL, block = NULL, ml = F, size = 1,
first = NULL)
```

## Arguments

|          |                                                                                                                                                                     |
|----------|---------------------------------------------------------------------------------------------------------------------------------------------------------------------|
| observ   | Data frame of observed data.                                                                                                                                        |
| dam      | Column name containing dam(female) parent identity information.                                                                                                     |
| sire     | Column name containing sire(male) parent identity information.                                                                                                      |
| response | Column name containing the offspring (response) phenotype values.                                                                                                   |
| position | Optional column name containing position factor information.                                                                                                        |
| block    | Optional column name containing block factor information.                                                                                                           |
| ml       | Default is FALSE for restricted maximum likelihood. Change to TRUE for maximum likelihood.                                                                          |
| size     | Default is 1 for delete-one jackknife resampling. If <i>size</i> > 1, delete- <i>d</i> jackknife resampling occurs removing a block <i>d</i> equal to <i>size</i> . |

**first** Number of initial sub-samples to run. Useful for examining if there is variation among sub-samples before jackknife resampling the entire data set. There can be little variation for delete-one jackknife resampling with large data sets, and delete- $d$  jackknife resampling should be considered.

### Details

Uses delete-one jackknife resampling (Efron & Tibshirani 1993, p. 141-145). For the option of delete- $d$  jackknife resampling, the rows of the observed data frame are shuffled and a block of observations of size  $d$  is deleted sequentially. Extracts the dam, sire, dam by sire, and residual variance components. Extracts optional position and block variance components. Calculates the total variance component. Calculates the additive genetic, non-additive genetic, and maternal variance components (see Lynch and Walsh 1998, p. 603).

### Value

A data frame with columns containing the raw variance components for dam, sire, dam by sire, residual, total, additive genetic, non-additive genetic, and maternal. Also columns containing the raw variance components for the options of position and/or block. The number of rows in the data frame matches the total number of observations ( $N$ ) for delete-one jackknife resampling or  $M$  groups for delete- $d$  jackknife resampling to the lowest integer. Each row represents a deleted single observation or deleted  $d$  observations group.

### Note

Maximum likelihood (ML) estimates the parameters that maximize the likelihood of the observed data and has the advantage of using all the data and accounting for non-independence (Lynch and Walsh 1998, p. 779; Bolker et al. 2009). On the other hand, ML has the disadvantage of assuming that all fixed effects are known without error, producing a downward bias in the estimation of the residual variance component. This bias can be large if there are lots of fixed effects, especially if sample sizes are small. Restricted maximum likelihood (REML) has the advantage of not assuming the fixed effects are known and averages over the uncertainty, so there can be less bias in the estimation of the residual variance component. However, REML only maximizes a portion of the likelihood to estimate the effect parameters, but is the preferred method for analyzing large data sets with complex structure.

### References

Efron B, Tibshirani R. 1993. An introduction to the Bootstrap. Chapman and Hall, New York.  
 Lynch M, Walsh B. 1998. Genetics and Analysis of Quantitative Traits. Sinauer Associates, Massachusetts.

### See Also

[JackLmer](#), [JackLmer3](#)

### Examples

```
data(chinook_length) #Chinook salmon offspring length

#Delete-one
#length_jack2<- JackLmer2(observ=chinook_length,dam="dam",sire="sire",response="length",
#position="tray")
length_jack2<- JackLmer2(observ=chinook_length,dam="dam",sire="sire",response="length",
```

```

position="tray",first=2) #first 2

#Delete-d, d=5
#length_jack2.2<- JackLmer2(observ=chinook_length,dam="dam",sire="sire",response="length",
#position="tray",size=5)
length_jack2.2<- JackLmer2(observ=chinook_length,dam="dam",sire="sire",response="length",
position="tray",size=5,first=2) #first 2

```

---

JackLmer3

*Jackknife components for normal data 3*


---

## Description

Extracts additive genetic, non-additive genetic, and maternal variance components from a linear mixed-effect model using the *lmer* function of the *lme4* package. Model random effects are dam, sire, dam by sire, and any additional fixed and/or random effects.

## Usage

```
JackLmer3(observ, dam, sire, response, remain, ml = F, size = 1, first = NULL)
```

## Arguments

|                       |                                                                                                                                                                                                                                                                                                             |
|-----------------------|-------------------------------------------------------------------------------------------------------------------------------------------------------------------------------------------------------------------------------------------------------------------------------------------------------------|
| <code>observ</code>   | Data frame of observed data                                                                                                                                                                                                                                                                                 |
| <code>dam</code>      | Column name containing dam(female) parent identity information.                                                                                                                                                                                                                                             |
| <code>sire</code>     | Column name containing sire(male) parent identity information.                                                                                                                                                                                                                                              |
| <code>response</code> | Column name containing the offspring (response) phenotype values.                                                                                                                                                                                                                                           |
| <code>remain</code>   | Remaining formula with # using <i>lme4</i> package format.                                                                                                                                                                                                                                                  |
| <code>ml</code>       | Default is FALSE for restricted maximum likelihood. Change to TRUE for maximum likelihood.                                                                                                                                                                                                                  |
| <code>size</code>     | Default is 1 for delete-one jackknife resampling. If <i>size</i> > 1, delete- <i>d</i> jackknife resampling occurs removing a block <i>d</i> equal to <i>size</i> .                                                                                                                                         |
| <code>first</code>    | Number of initial sub-samples to run. Useful for examining if there is variation among sub-samples before jackknife resampling the entire data set. There can be little variation for delete-one jackknife resampling with large data sets, and delete- <i>d</i> jackknife resampling should be considered. |

## Details

Uses delete-one jackknife resampling (Efron & Tibshirani 1993, p. 141-145). For the option of delete-*d* jackknife resampling, the rows of the observed data frame are shuffled and a block of observations of size *d* is deleted sequentially. Extracts the dam, sire, dam, dam by sire, and residual variance components. Extracts any additional fixed effect and random effect variance components. The fixed-effect variance component is as a single group using the method described by Nakagawa and Schielzeth (2013). Calculates the total variance component. Calculates the additive genetic, non-additive genetic, and maternal variance components (see Lynch and Walsh 1998, p. 603).

**Value**

A data frame with columns containing the raw variance components for dam, sire, dam by sire, residual, total, additive genetic, non-additive genetic, and maternal. Also columns containing the raw variance components for remaining formula components. The number of rows in the data frame matches the total number of observations ( $N$ ) for delete-one jackknife resampling or  $M$  groups for delete- $d$  jackknife resampling to the lowest integer. Each row represents a deleted single observation or deleted  $d$  observations group.

**Note**

Maximum likelihood (ML) estimates the parameters that maximize the likelihood of the observed data and has the advantage of using all the data and accounting for non-independence (Lynch and Walsh 1998, p. 779; Bolker et al. 2009). On the other hand, ML has the disadvantage of assuming that all fixed effects are known without error, producing a downward bias in the estimation of the residual variance component. This bias can be large if there are lots of fixed effects, especially if sample sizes are small. Restricted maximum likelihood (REML) has the advantage of not assuming the fixed effects are known and averages over the uncertainty, so there can be less bias in the estimation of the residual variance component. However, REML only maximizes a portion of the likelihood to estimate the effect parameters, but is the preferred method for analyzing large data sets with complex structure.

**References**

- Efron B, Tibshirani R. 1993. An introduction to the Bootstrap. Chapman and Hall, New York.
- Lynch M, Walsh B. 1998. Genetics and Analysis of Quantitative Traits. Sinauer Associates, Massachusetts.
- Nakagawa S, Schielzeth H. 2013. A general and simple method for obtaining R2 from generalized linear mixed-effects models. *Methods in Ecology and Evolution* 4(2): 133-142. DOI: 10.1111/j.2041-210x.2012.00261.x

**See Also**

[JackLmer](#), [JackLmer2](#)

**Examples**

```
data(chinook_length) #Chinook salmon offspring length

#Delete-one
#length_jack3<- JackLmer3(observ=chinook_length,dam="dam",sire="sire",response="length",
#remain="egg_size + (1|tray)")
length_jack3<- JackLmer3(observ=chinook_length,dam="dam",sire="sire",response="length",
remain="egg_size + (1|tray)",first=2) #first 2

#Delete-d, d=5
#length_jack3.2<- JackLmer3(observ=chinook_length,dam="dam",sire="sire",response="length",
#remain="egg_size + (1|tray)",size=5)
length_jack3.2<- JackLmer3(observ=chinook_length,dam="dam",sire="sire",response="length",
remain="egg_size + (1|tray)",size=5,first=2) #first 2
```

---

 observGlmmer

*Variance components for non-normal data*


---

### Description

Extracts additive genetic, non-additive genetic, and maternal variance components from a generalized linear mixed-effect model using the *glmer* function of the *lme4* package. Model random effects are dam, sire, and dam by sire.

### Usage

```
observGlmmer(observ, dam, sire, response, fam_link, quasi = F)
```

### Arguments

|          |                                                                                                                                        |
|----------|----------------------------------------------------------------------------------------------------------------------------------------|
| observ   | Data frame of observed data.                                                                                                           |
| dam      | Column name containing dam(female) parent identity information.                                                                        |
| sire     | Column name containing sire(male) parent identity information.                                                                         |
| response | Column name containing the offspring (response) phenotype values.                                                                      |
| fam_link | The family and link in family(link) format. Supported options are binomial(logit), binomial(probit), poisson(log), and poisson (sqrt). |
| quasi    | Incorporate overdispersion or quasi-error structure.                                                                                   |

### Details

Laplace approximation parameter estimation is used, which is a true likelihood method (Bolker et al. 2009). For the overdispersion option, an observation-level random effect is added to the model (Atkins et al. 2013). Extracts the dam, sire, dam, and dam by sire variance components. The residual variance component for the *fam\_links* are described by Nakagawa and Schielzeth (2010, 2013). Calculates the total variance component. Calculates the additive genetic, non-additive genetic, and maternal variance components (see Lynch and Walsh 1998, p. 603). Significance values for the random effects are determined using likelihood ratio tests (Bolker et al. 2009).

### Value

A list object containing the raw variance components, the variance components as a percentage of the total variance component. Also, contains the difference in AIC and BIC, and likelihood ratio test Chi-square and p-value for all random effects.

### Note

The Laplace approximation is used because there were fewer disadvantages relative to penalized quasi-likelihood and Gauss-Hermite quadrature parameter estimation (Bolker et al. 2009). That is, penalized quasi-likelihood is not recommended for count responses with means less than 5 and binary responses with less than 5 successes per group. Gauss-Hermite quadrature is not recommended for more than two or three random effects because of the rapidly declining analytical speed with the increasing number of random effects.

## References

Atkins DC, Baldwin SA, Zheng C, Gallop RJ, Neighbors C. 2013. A tutorial on count regression and zero-altered count models for longitudinal substance use data. *Psychology of Addictive Behaviors* 27(1): 166-177. DOI: 10.1037/a0029508

Bolker BM, Brooks ME, Clark CJ, Geange SW, Poulsen JR, Stevens MHH, White J-SS. 2009. Generalized linear mixed models: a practical guide for ecology and evolution. *Trends in Ecology and Evolution* 24(3): 127-135. DOI: 10.1016/j.tree.2008.10.008

Lynch M, Walsh B. 1998. *Genetics and Analysis of Quantitative Traits*. Sinauer Associates, Massachusetts.

Nakagawa S, Schielzeth H. 2010. Repeatability for Gaussian and non-Gaussian data: a practical guide for biologists. *Biological Reviews* 85(4): 935-956. DOI: 10.1111/j.1469-185X.2010.00141.x

Nakagawa S, Schielzeth H. 2013. A general and simple method for obtaining R2 from generalized linear mixed-effects models. *Methods in Ecology and Evolution* 4(2): 133-142. DOI: 10.1111/j.2041-210x.2012.00261.x

## See Also

[observGlm2](#), [observGlm3](#)

## Examples

```
data(chinook_survival) #Chinook salmon offspring survival
## Convert replicate-level recorded data to individual-level (binary) data
chinook_survival2<- buildBinary(dat=chinook_survival,copy=c(2:6,9),one="alive",zero="dead")
#
survival_mod1<- observGlm2(observ=chinook_survival2,dam="dam",sire="sire",response="status",
fam_link=binomial(logit)) #a few minutes
survival_mod1
```

---

observGlm2

*Variance components for non-normal data 2*

---

## Description

Extracts additive genetic, non-additive genetic, and maternal variance components from a generalized linear mixed-effect model using the *glmer* function of the *lme4* package. Model random effects are dam, sire, and dam by sire. Options to include one random position and/or one random block effect(s).

## Usage

```
observGlm2(observ, dam, sire, response, fam_link, position = NULL, block = NULL,
quasi = F)
```

## Arguments

|        |                                                                 |
|--------|-----------------------------------------------------------------|
| observ | Data frame of observed data.                                    |
| dam    | Column name containing dam(female) parent identity information. |
| sire   | Column name containing sire(male) parent identity information.  |

|          |                                                                                                                                        |
|----------|----------------------------------------------------------------------------------------------------------------------------------------|
| response | Column name containing the offspring (response) phenotype values.                                                                      |
| fam_link | The family and link in family(link) format. Supported options are binomial(logit), binomial(probit), poisson(log), and poisson (sqrt). |
| position | Optional column name containing position factor information.                                                                           |
| block    | Optional column name containing block factor information.                                                                              |
| quasi    | Incorporate overdispersion or quasi-error structure.                                                                                   |

### Details

Laplace approximation parameter estimation is used, which is a true likelihood method (Bolker et al. 2009). For the overdispersion option, an observation-level random effect is added to the model (Atkins et al. 2013). Extracts the dam, sire, dam, and dam by sire variance components. Extracts optional position and block variance components. The residual variance component for the *fam\_links* are described by Nakagawa and Schielzeth (2010, 2013). Calculates the total variance component. Calculates the additive genetic, non-additive genetic, and maternal variance components (see Lynch and Walsh 1998, p. 603). Significance values for the random effects are determined using likelihood ratio tests (Bolker et al. 2009).

### Value

A list object containing the raw variance components, the variance components as a percentage of the total variance component. Also, contains the difference in AIC and BIC, and likelihood ratio test Chi-square and p-value for all random effects.

### Note

The Laplace approximation is used because there were fewer disadvantages relative to penalized quasi-likelihood and Gauss-Hermite quadrature parameter estimation (Bolker et al. 2009). That is, penalized quasi-likelihood is not recommended for count responses with means less than 5 and binary responses with less than 5 successes per group. Gauss-Hermite quadrature is not recommended for more than two or three random effects because of the rapidly declining analytical speed with the increasing number of random effects.

### References

- Atkins DC, Baldwin SA, Zheng C, Gallop RJ, Neighbors C. 2013. A tutorial on count regression and zero-altered count models for longitudinal substance use data. *Psychology of Addictive Behaviors* 27(1): 166-177. DOI: 10.1037/a0029508
- Bolker BM, Brooks ME, Clark CJ, Geange SW, Poulsen JR, Stevens MHH, White J-SS. 2009. Generalized linear mixed models: a practical guide for ecology and evolution. *Trends in Ecology and Evolution* 24(3): 127-135. DOI: 10.1016/j.tree.2008.10.008
- Lynch M, Walsh B. 1998. *Genetics and Analysis of Quantitative Traits*. Sinauer Associates, Massachusetts.
- Nakagawa S, Schielzeth H. 2010. Repeatability for Gaussian and non-Gaussian data: a practical guide for biologists. *Biological Reviews* 85(4): 935-956. DOI: 10.1111/j.1469-185X.2010.00141.x
- Nakagawa S, Schielzeth H. 2013. A general and simple method for obtaining R<sup>2</sup> from generalized linear mixed-effects models. *Methods in Ecology and Evolution* 4(2): 133-142. DOI: 10.1111/j.2041-210x.2012.00261.x

### See Also

[observGlmr](#), [observGlmr3](#)

## Examples

```
data(chinook_survival) #Chinook salmon offspring survival
## Convert replicate-level recorded data to individual-level (binary) data
chinook_survival2<- buildBinary(dat=chinook_survival,copy=c(2:6,9),one="alive",zero="dead")
#
survival_mod2<- observGlm2(observ=chinook_survival2,dam="dam",sire="sire",
response="status",fam_link=binomial(logit),position="tray") #a few minutes
survival_mod2
```

---

observGlm3

*Variance components for non-normal data 3*


---

## Description

Extracts additive genetic, non-additive genetic, and maternal variance components from a generalized linear mixed-effect model using the *glmer* function of the *lme4* package. Model random effects are dam, sire, dam by sire, and any additional fixed and/or random effects.

## Usage

```
observGlm3(observ, dam, sire, response, fam_link, remain, quasi = F, iter = 1000)
```

## Arguments

|          |                                                                                                                                        |
|----------|----------------------------------------------------------------------------------------------------------------------------------------|
| observ   | Data frame of observed data.                                                                                                           |
| dam      | Column name containing dam(female) parent identity information.                                                                        |
| sire     | Column name containing sire(male) parent identity information.                                                                         |
| response | Column name containing the offspring (response) phenotype values.                                                                      |
| fam_link | The family and link in family(link) format. Supported options are binomial(logit), binomial(probit), poisson(log), and poisson (sqrt). |
| remain   | Remaining formula using <i>lme4</i> package format.                                                                                    |
| quasi    | Incorporate overdispersion or quasi-error structure.                                                                                   |
| iter     | Number of iterations for computing the parametric bootstrap significance value for any fixed effects.                                  |

## Details

Laplace approximation parameter estimation is used, which is a true likelihood method (Bolker et al. 2009). For the overdispersion option, an observation-level random effect is added to the model (Atkins et al. 2013). Extracts the dam, sire, dam, and dam by sire variance components. Extracts any additional fixed effect and random effect variance components. The fixed-effect variance component is as a single group using the method described by Nakagawa and Schielzeth (2013). The residual variance component for the *fam\_links* are described by Nakagawa and Schielzeth (2010, 2013). Calculates the total variance component. Calculates the additive genetic, non-additive genetic, and maternal variance components (see Lynch and Walsh 1998, p. 603). Significance values for the random effects are determined using likelihood ratio tests (Bolker et al. 2009). Significance values for any fixed effects are determined using likelihood ratio tests and a parametric bootstrap method (Bolker et al. 2009) from the *mixed* function of the *afex* package.



**Value**

A list object containing the raw variance components, the variance components as a percentage of the total variance component. Contains the difference in AIC and BIC, likelihood ratio test Chi-square and p-value for both random and fixed effects. Also contains the parametric bootstrap p-value for fixed effects.

**Note**

The Laplace approximation is used because there were fewer disadvantages relative to penalized quasi-likelihood and Gauss-Hermite quadrature parameter estimation (Bolker et al. 2009). That is, penalized quasi-likelihood is not recommended for count responses with means less than 5 and binary responses with less than 5 successes per group. Gauss-Hermite quadrature is not recommended for more than two or three random effects because of the rapidly declining analytical speed with the increasing number of random effects.

**References**

Atkins DC, Baldwin SA, Zheng C, Gallop RJ, Neighbors C. 2013. A tutorial on count regression and zero-altered count models for longitudinal substance use data. *Psychology of Addictive Behaviors* 27(1): 166-177. DOI: 10.1037/a0029508

Bolker BM, Brooks ME, Clark CJ, Geange SW, Poulsen JR, Stevens MHH, White J-SS. 2009. Generalized linear mixed models: a practical guide for ecology and evolution. *Trends in Ecology and Evolution* 24(3): 127-135. DOI: 10.1016/j.tree.2008.10.008

Lynch M, Walsh B. 1998. *Genetics and Analysis of Quantitative Traits*. Sinauer Associates, Massachusetts.

Nakagawa S, Schielzeth H. 2010. Repeatability for Gaussian and non-Gaussian data: a practical guide for biologists. *Biological Reviews* 85(4): 935-956. DOI: 10.1111/j.1469-185X.2010.00141.x

Nakagawa S, Schielzeth H. 2013. A general and simple method for obtaining R<sup>2</sup> from generalized linear mixed-effects models. *Methods in Ecology and Evolution* 4(2): 133-142. DOI: 10.1111/j.2041-210x.2012.00261.x

**See Also**

[observGlm](#), [observGlm2](#)

**Examples**

```
data(chinook_survival) #Chinook salmon offspring survival
## Convert replicate-level recorded data to individual-level (binary) data
chinook_survival2<- buildBinary(dat=chinook_survival,copy=c(2:6,9),one="alive",zero="dead")
#just a few iterations for the p-value of fixed effect
survival_mod3<- observGlm3(observ=chinook_survival2,dam="dam",sire="sire",
response="status",fam_link=binomial(logit),remain="egg_size + (1|tray)",iter=5)
#a few minutes

survival_mod3
```

---

 observLmer

*Variance components for normal data*


---

### Description

Extracts additive genetic, non-additive genetic, and maternal variance components from a linear mixed-effect model using the *lmer* function of the *lme4* package. Model random effects are dam, sire, and dam by sire.

### Usage

```
observLmer(observ, dam, sire, response, ml = F)
```

### Arguments

|          |                                                                                            |
|----------|--------------------------------------------------------------------------------------------|
| observ   | Data frame of observed data.                                                               |
| dam      | Column name containing dam(female) parent identity information.                            |
| sire     | Column name containing sire(male) parent identity information.                             |
| response | Column name containing the offspring (response) phenotype values.                          |
| ml       | Default is FALSE for restricted maximum likelihood. Change to TRUE for maximum likelihood. |

### Details

Extracts the dam, sire, dam, dam by sire, and residual variance components. Calculates the total variance component. Calculates the additive genetic, non-additive genetic, and maternal variance components (see Lynch and Walsh 1998, p. 603). Significance values for the random effects are determined using likelihood ratio tests (Bolker et al. 2009).

### Value

A list object containing the raw variance components, the variance components as a percentage of the total variance component. Also, contains the difference in AIC and BIC, and likelihood ratio test Chi-square and p-value for all random effects.

### Note

Maximum likelihood (ML) estimates the parameters that maximize the likelihood of the observed data and has the advantage of using all the data and accounting for non-independence (Lynch and Walsh 1998, p. 779; Bolker et al. 2009). On the other hand, ML has the disadvantage of assuming that all fixed effects are known without error, producing a downward bias in the estimation of the residual variance component. This bias can be large if there are lots of fixed effects, especially if sample sizes are small. Restricted maximum likelihood (REML) has the advantage of not assuming the fixed effects are known and averages over the uncertainty, so there can be less bias in the estimation of the residual variance component. However, REML only maximizes a portion of the likelihood to estimate the effect parameters, but is the preferred method for analyzing large data sets with complex structure.

## References

Bolker BM, Brooks ME, Clark CJ, Geange SW, Poulsen JR, Stevens MHH, White J-SS. 2009. Generalized linear mixed models: a practical guide for ecology and evolution. *Trends in Ecology and Evolution* 24(3): 127-135. DOI: 10.1016/j.tree.2008.10.008

Lynch M, Walsh B. 1998. *Genetics and Analysis of Quantitative Traits*. Sinauer Associates, Massachusetts.

## See Also

[observLmer2](#), [observLmer3](#)

## Examples

```
data(chinook_length) #Chinook salmon offspring length
length_mod1<- observLmer(observ=chinook_length,dam="dam",sire="sire",response="length")
length_mod1
```

---

observLmer2

*Variance components for normal data 2*

---

## Description

Extracts additive genetic, non-additive genetic, and maternal variance components from a linear mixed-effect model using the *lmer* function of the *lme4* package. Model random effects are dam, sire, and dam by sire. Options to include one random position and/or one random block effect(s).

## Usage

```
observLmer2(observ, dam, sire, response, position = NULL, block = NULL, ml = F)
```

## Arguments

|          |                                                                                            |
|----------|--------------------------------------------------------------------------------------------|
| observ   | Data frame of observed data.                                                               |
| dam      | Column name containing dam(female) parent identity information.                            |
| sire     | Column name containing sire(male) parent identity information.                             |
| response | Column name containing the offspring (response) phenotype values.                          |
| position | Optional column name containing position factor information.                               |
| block    | Optional column name containing block factor information.                                  |
| ml       | Default is FALSE for restricted maximum likelihood. Change to TRUE for maximum likelihood. |

## Details

Extracts the dam, sire, dam, dam by sire, and residual variance components. Extracts optional position and block variance components. Calculates the total variance component. Calculates the additive genetic, non-additive genetic, and maternal variance components (see Lynch and Walsh 1998, p. 603). Significance values for the random effects are determined using likelihood ratio tests (Bolker et al. 2009).

**Value**

A list object containing the raw variance components, the variance components as a percentage of the total variance component. Also, contains the difference in AIC and BIC, and likelihood ratio test Chi-square and p-value for all random effects.

**Note**

Maximum likelihood (ML) estimates the parameters that maximize the likelihood of the observed data and has the advantage of using all the data and accounting for non-independence (Lynch and Walsh 1998, p. 779; Bolker et al. 2009). On the other hand, ML has the disadvantage of assuming that all fixed effects are known without error, producing a downward bias in the estimation of the residual variance component. This bias can be large if there are lots of fixed effects, especially if sample sizes are small. Restricted maximum likelihood (REML) has the advantage of not assuming the fixed effects are known and averages over the uncertainty, so there can be less bias in the estimation of the residual variance component. However, REML only maximizes a portion of the likelihood to estimate the effect parameters, but is the preferred method for analyzing large data sets with complex structure.

**References**

Bolker BM, Brooks ME, Clark CJ, Geange SW, Poulsen JR, Stevens MHH, White J-SS. 2009. Generalized linear mixed models: a practical guide for ecology and evolution. *Trends in Ecology and Evolution* 24(3): 127-135. DOI: 10.1016/j.tree.2008.10.008

Lynch M, Walsh B. 1998. *Genetics and Analysis of Quantitative Traits*. Sinauer Associates, Massachusetts.

**See Also**

[observLmer](#), [observLmer3](#)

**Examples**

```
data(chinook_length) #Chinook salmon offspring length
length_mod2<- observLmer2(observ=chinook_length,dam="dam",sire="sire",response="length",
position="tray")
length_mod2
```

---

observLmer3

*Variance components for normal data 3*

---

**Description**

Extracts additive genetic, non-additive genetic, and maternal variance components from a linear mixed-effect model using the *lmer* function of the *lme4* package. Model random effects are dam, sire, dam by sire, and any additional fixed and/or random effects.

**Usage**

```
observLmer3(observ, dam, sire, response, remain, ml = F, iter = 1000)
```

**Arguments**

|          |                                                                                                       |
|----------|-------------------------------------------------------------------------------------------------------|
| observ   | Data frame of observed data.                                                                          |
| dam      | Column name containing dam(female) parent identity information.                                       |
| sire     | Column name containing sire(male) parent identity information.                                        |
| response | Column name containing the offspring (response) phenotype values.                                     |
| remain   | Remaining formula using <i>lme4</i> package format.                                                   |
| ml       | Default is FALSE for restricted maximum likelihood. Change to TRUE for maximum likelihood.            |
| iter     | Number of iterations for computing the parametric bootstrap significance value for any fixed effects. |

**Details**

Extracts the dam, sire, dam, dam by sire, and residual variance components. Extracts any additional fixed effect and random effect variance components. The fixed-effect variance component is as a single group using the method described by Nakagawa and Schielzeth (2013). Calculates the total variance component. Calculates the additive genetic, non-additive genetic, and maternal variance components (see Lynch and Walsh 1998, p. 603). Significance values for the random effects are determined using likelihood ratio tests (Bolker et al. 2009). Significance values for any fixed effects are determined using likelihood ratio tests and a parametric bootstrap method (Bolker et al. 2009) from the *mixed* function of the *afex* package.

**Value**

A list object containing the raw variance components, the variance components as a percentage of the total variance component. Contains the difference in AIC and BIC, likelihood ratio test Chi-square and p-value for both random and fixed effects. Also contains the parametric bootstrap p-value for fixed effects.

**Note**

Maximum likelihood (ML) estimates the parameters that maximize the likelihood of the observed data and has the advantage of using all the data and accounting for non-independence (Lynch and Walsh 1998, p. 779; Bolker et al. 2009). On the other hand, ML has the disadvantage of assuming that all fixed effects are known without error, producing a downward bias in the estimation of the residual variance component. This bias can be large if there are lots of fixed effects, especially if sample sizes are small. Restricted maximum likelihood (REML) has the advantage of not assuming the fixed effects are known and averages over the uncertainty, so there can be less bias in the estimation of the residual variance component. However, REML only maximizes a portion of the likelihood to estimate the effect parameters, but is the preferred method for analyzing large data sets with complex structure.

**References**

- Bolker BM, Brooks ME, Clark CJ, Geange SW, Poulsen JR, Stevens MHH, White J-SS. 2009. Generalized linear mixed models: a practical guide for ecology and evolution. *Trends in Ecology and Evolution* 24(3): 127-135. DOI: 10.1016/j.tree.2008.10.008
- Lynch M, Walsh B. 1998. *Genetics and Analysis of Quantitative Traits*. Sinauer Associates, Massachusetts.

Nakagawa S, Schielzeth H. 2013. A general and simple method for obtaining R2 from generalized linear mixed-effects models. *Methods in Ecology and Evolution* 4(2): 133-142. DOI: 10.1111/j.2041-210x.2012.00261.x

### See Also

[observLmer](#), [observLmer2](#)

### Examples

```
data(chinook_length) #Chinook salmon offspring length
#just a few iterations for the p-value of fixed effect
length_mod3<- observLmer3(observ=chinook_length,dam="dam",sire="sire",response="length",
remain="egg_size + (1|tray)",iter=5)
length_mod3
```

---

powerGlmer

*Power analysis for non-normal data*

---

### Description

Extracts the power values of dam, sire, and dam by sire variance components from a generalized linear mixed-effect model using the *glmer* function of the *lme4* package.

### Usage

```
powerGlmer(varcomp, nval, fam_link, alpha = 0.05, nsim = 100, poisLog = NULL)
```

### Arguments

|          |                                                                                                                                        |
|----------|----------------------------------------------------------------------------------------------------------------------------------------|
| varcomp  | Vector of known dam, sire, and dam by sire variance components, i.e. c(dam,sire,ds).                                                   |
| nval     | Vector of known dam, sire, and offspring per family sample sizes, i.e. c(dam,sire, offspring).                                         |
| fam_link | The family and link in family(link) format. Supported options are binomial(logit), binomial(probit), poisson(log), and poisson (sqrt). |
| alpha    | Statistical significance value. Default is 0.05.                                                                                       |
| nsim     | Number of simulations. Default is 100.                                                                                                 |
| poisLog  | Known poisson(log) variance component value.                                                                                           |

### Details

Extracts the dam, sire, dam, and dam by sire power values. The residual variance component for the *fam\_links* are described by Nakagawa and Schielzeth (2010, 2013). Power values are calculated by stochastically simulation data and then calculating the proportion of significance values less than *alpha* for each component (Bolker 2008). Significance values for the random effects are determined using likelihood ratio tests (Bolker et al. 2009).

### Value

A data frame with the sample sizes, variance component inputs, variance component outputs, and power values.

**Note**

The Laplace approximation is used because there were fewer disadvantages relative to penalized quasi-likelihood and Gauss-Hermite quadrature parameter estimation (Bolker et al. 2009). That is, penalized quasi-likelihood is not recommended for count responses with means less than 5 and binary responses with less than 5 successes per group. Gauss-Hermite quadrature is not recommended for more than two or three random effects because of the rapidly declining analytical speed with the increasing number of random effects.

**References**

- Bolker BM. 2008. Ecological models and data in R. Princeton University Press, New Jersey.
- Bolker BM, Brooks ME, Clark CJ, Geange SW, Poulsen JR, Stevens MHH, White J-SS. 2009. Generalized linear mixed models: a practical guide for ecology and evolution. *Trends in Ecology and Evolution* 24(3): 127-135. DOI: 10.1016/j.tree.2008.10.008
- Lynch M, Walsh B. 1998. Genetics and Analysis of Quantitative Traits. Sinauer Associates, Massachusetts.
- Nakagawa S, Schielzeth H. 2010. Repeatability for Gaussian and non-Gaussian data: a practical guide for biologists. *Biological Reviews* 85(4): 935-956. DOI: 10.1111/j.1469-185X.2010.00141.x
- Nakagawa S, Schielzeth H. 2013. A general and simple method for obtaining R2 from generalized linear mixed-effects models. *Methods in Ecology and Evolution* 4(2): 133-142. DOI: 10.1111/j.2041-210x.2012.00261.x

**See Also**

[powerGlmer2](#), [powerGlmer3](#)

**Examples**

```
#100 simulations
#pwr_G1<- powerGlmer(varcomp=c(1,0.15,0.11),nval=c(10,10,20),fam_link=binomial(logit))
#pwr_G1
#5 simulations
pwr_G1<- powerGlmer(varcomp=c(1,0.15,0.11),nval=c(10,10,20),fam_link=binomial(logit),
nsim=5)
pwr_G1
```

---

powerGlmer2

*Power analysis for non-normal data 2*

---

**Description**

Extracts the power values of dam, sire, and dam by sire variance components from a generalized linear mixed-effect model using the *glmer* function of the *lme4* package. Options to include one random position and/or one random block effect(s).

**Usage**

```
powerGlmer2(varcomp, nval, fam_link, alpha = 0.05, nsim = 100, position = NULL,
block = NULL, poisLog = NULL)
```

**Arguments**

|          |                                                                                                                                                                                                            |
|----------|------------------------------------------------------------------------------------------------------------------------------------------------------------------------------------------------------------|
| varcomp  | Vector of known dam, sire, dam by sire, and position and/or block variance components, i.e. c(dam,sire,ds,position/block). If there is a position and a block c(..., ds, position, block).                 |
| nval     | Vector of known dam, sire, offspring per family, and position and/or block sample sizes, i.e. c(dam,sire,offspring,position/block). If there is a position and a block c(..., offspring, position, block). |
| fam_link | The family and link in family(link) format. Supported options are binomial(logit), binomial(probit), poisson(log), and poisson (sqrt).                                                                     |
| alpha    | Statistical significance value. Default is 0.05.                                                                                                                                                           |
| nsim     | Number of simulations. Default is 100.                                                                                                                                                                     |
| position | Optional number of replicates to divide the number of offspring for the number of positions.                                                                                                               |
| block    | Optional vector of dams and sires per block, e.g. c(2,2).                                                                                                                                                  |
| poisLog  | Known poisson(log) variance component value.                                                                                                                                                               |

**Details**

Extracts the dam, sire, dam, dam by sire, and position and/or block power values. The residual variance component for the *fam\_links* are described by Nakagawa and Schielzeth (2010, 2013). Power values are calculated by stochastically simulation data and then calculating the proportion of significance values less than *alpha* for each component (Bolker 2008). Significance values for the random effects are determined using likelihood ratio tests (Bolker et al. 2009).

**Value**

A data frame with the sample sizes, variance component inputs, variance component outputs, and power values.

**Note**

The Laplace approximation is used because there were fewer disadvantages relative to penalized quasi-likelihood and Gauss-Hermite quadrature parameter estimation (Bolker et al. 2009). That is, penalized quasi-likelihood is not recommended for count responses with means less than 5 and binary responses with less than 5 successes per group. Gauss-Hermite quadrature is not recommended for more than two or three random effects because of the rapidly declining analytical speed with the increasing number of random effects.

**References**

- Bolker BM. 2008. Ecological models and data in R. Princeton University Press, New Jersey.
- Bolker BM, Brooks ME, Clark CJ, Geange SW, Poulsen JR, Stevens MHH, White J-SS. 2009. Generalized linear mixed models: a practical guide for ecology and evolution. *Trends in Ecology and Evolution* 24(3): 127-135. DOI: 10.1016/j.tree.2008.10.008
- Lynch M, Walsh B. 1998. Genetics and Analysis of Quantitative Traits. Sinauer Associates, Massachusetts.
- Nakagawa S, Schielzeth H. 2010. Repeatability for Gaussian and non-Gaussian data: a practical guide for biologists. *Biological Reviews* 85(4): 935-956. DOI: 10.1111/j.1469-185X.2010.00141.x
- Nakagawa S, Schielzeth H. 2013. A general and simple method for obtaining R<sup>2</sup> from generalized linear mixed-effects models. *Methods in Ecology and Evolution* 4(2): 133-142. DOI: 10.1111/j.2041-210x.2012.00261.x



**See Also**

[powerGlm](#), [powerGlm3](#)

**Examples**

```
#100 simulations
#pwr_G2<- powerGlm2(varcomp=c(1,0.15,0.11,0.5),nval=c(10,10,20,10),
#fam_link=binomial(logit),position=2)
#pwr_G2
#5 simulations
pwr_G2<- powerGlm2(varcomp=c(1,0.15,0.11,0.5),nval=c(10,10,20,10),
fam_link=binomial(logit),position=2,nsim=5)
pwr_G2
```

---

powerGlm3

*Power analysis for non-normal data 3*

---

**Description**

Extracts the power values of dam, sire, and dam by sire variance components from a generalized linear mixed-effect model using the *glmer* function of the *lme4* package. Model can include additional fixed and/or random effects.

**Usage**

```
powerGlm3(var_rand, n_rand, design, remain, fam_link, var_fix = NULL, n_fix = NULL,
alpha = 0.05, nsim = 100, poisLog = NULL, ftest = "LR", iter = NULL)
```

**Arguments**

|          |                                                                                                                                                                                                                                                                                                        |
|----------|--------------------------------------------------------------------------------------------------------------------------------------------------------------------------------------------------------------------------------------------------------------------------------------------------------|
| var_rand | Vector of known dam, sire, dam by sire, and remaining random variance components, i.e. <code>c(dam,sire,ds,rand1,rand2,...)</code> .                                                                                                                                                                   |
| n_rand   | Vector of known dam, sire, family, and remaining random sample sizes, i.e. <code>c(dam,sire,family,rand1,rand2,...)</code> .                                                                                                                                                                           |
| design   | A data frame of the experimental design, using only integers. First three columns must contain and be named "dam", "sire", "family". Remaining columns are the random effects followed by the fixed effects. Continuous fixed effects are a column containing the values <code>1:nrow(design)</code> . |
| remain   | Remaining formula using <i>lme4</i> package format. Must be random effects followed by fixed effects. No interactions or random slopes; formulate as intercepts in design.                                                                                                                             |
| fam_link | The family and link in family(link) format. Supported options are <code>binomial(logit)</code> , <code>binomial(probit)</code> , <code>poisson(log)</code> , and <code>poisson(sqrt)</code> .                                                                                                          |
| var_fix  | Vector of known fixed variance components, i.e. <code>c(fix1,fix2,...)</code> . Continuous fixed random values are sorted to match column values.                                                                                                                                                      |
| n_fix    | Vector of known fixed sample sizes, i.e. <code>c(fix1,fix2,...)</code> . Continuous fixed effects must have a sample size of 1.                                                                                                                                                                        |
| alpha    | Statistical significance value. Default is 0.05.                                                                                                                                                                                                                                                       |
| nsim     | Number of simulations. Default is 100.                                                                                                                                                                                                                                                                 |

|         |                                                                                                       |
|---------|-------------------------------------------------------------------------------------------------------|
| poisLog | Known poisson(log) variance component value.                                                          |
| ftest   | Default is "LR" for likelihood ratio test for fixed effects. Option "PB" is for parametric bootstrap. |
| iter    | Number of iterations for computing the parametric bootstrap significance value for any fixed effects. |

### Details

Extracts the dam, sire, dam, dam by sire, and any remaining random and fixed effects power values. The residual variance component for the *fam\_links* are described by Nakagawa and Schielzeth (2010, 2013). Power values are calculated by stochastically simulation data and then calculating the proportion of significance values less than *alpha* for each component (Bolker 2008). Significance values for the random effects are determined using likelihood ratio tests (Bolker et al. 2009). Significance values for any fixed effects are determined using likelihood ratio tests or parametric bootstrap method (Bolker et al. 2009) from the *mixed* function of the *afex* package.

### Value

A data frame with the sample sizes, variance component inputs, variance component outputs, and power values.

### Note

The Laplace approximation is used because there were fewer disadvantages relative to penalized quasi-likelihood and Gauss-Hermite quadrature parameter estimation (Bolker et al. 2009). That is, penalized quasi-likelihood is not recommended for count responses with means less than 5 and binary responses with less than 5 successes per group. Gauss-Hermite quadrature is not recommended for more than two or three random effects because of the rapidly declining analytical speed with the increasing number of random effects.

### References

- Bolker BM. 2008. Ecological models and data in R. Princeton University Press, New Jersey.
- Bolker BM, Brooks ME, Clark CJ, Geange SW, Poulsen JR, Stevens MHH, White J-SS. 2009. Generalized linear mixed models: a practical guide for ecology and evolution. *Trends in Ecology and Evolution* 24(3): 127-135. DOI: 10.1016/j.tree.2008.10.008
- Lynch M, Walsh B. 1998. Genetics and Analysis of Quantitative Traits. Sinauer Associates, Massachusetts.
- Nakagawa S, Schielzeth H. 2010. Repeatability for Gaussian and non-Gaussian data: a practical guide for biologists. *Biological Reviews* 85(4): 935-956. DOI: 10.1111/j.1469-185X.2010.00141.x
- Nakagawa S, Schielzeth H. 2013. A general and simple method for obtaining R2 from generalized linear mixed-effects models. *Methods in Ecology and Evolution* 4(2): 133-142. DOI: 10.1111/j.2041-210x.2012.00261.x

### See Also

[powerGlmer](#), [powerGlmer2](#)

## Examples

```
##design object: 2 remaining random effects and 1 continous fixed effect
block=c(2,2); blocN=10; position=2; posN=10; offN=20
dam0<- stack(as.data.frame(matrix(1:(block[1]*blocN),ncol=blocN,nrow=block[1])))
sire0<- stack(as.data.frame(matrix(1:(block[2]*blocN),ncol=blocN,nrow=block[2])))
observ0<- merge(dam0,sire0, by="ind")
levels(observ0[,1])<- 1:blocN; colnames(observ0)<- c("block","dam","sire")
observ0$family<- 1:nrow(observ0) #add family
#expand for position
observ1<- do.call("rbind", replicate(position,observ0,simplify=FALSE));rm(observ0)
observ1$position<- sample(rep(1:posN,each=position)) #random assignment
#expand for offspring
observ<- do.call("rbind", replicate(offN,observ1,simplify=FALSE)); rm(observ1)
desn<- observ[,c(2,3,4,5,1)];rm(observ) #dam,sire,family,position,block
desn$egg_size<- 1:nrow(desn)
colnames(desn)[6]<- "egg_size"

#100 simulations
#pwr_G3<- powerG3mer3(var_rand=c(1,0.15,0.11,0.5,0.3),n_rand=c(20,20,40,10,10),
#fam_link=binomial(logit),var_fix=0.1,n_fix=1,design=desn,
#remain="(1|position)+(1|block)+egg_size")
#pwr_G3
#5 simulations
pwr_G3<- powerG3mer3(var_rand=c(1,0.15,0.11,0.5,0.3),n_rand=c(20,20,40,10,10),
fam_link=binomial(logit),var_fix=0.1,n_fix=1,design=desn,
remain="(1|position)+(1|block)+egg_size",nsim=5)
pwr_G3
```

---

powerLmer

*Power analysis for normal data*

---

## Description

Extracts the power values of dam, sire, and dam by sire variance components from a linear mixed-effect model using the *lmer* function of the *lme4* package.

## Usage

```
powerLmer(varcomp, nval, alpha = 0.05, nsim = 100, ml = F)
```

## Arguments

|         |                                                                                                    |
|---------|----------------------------------------------------------------------------------------------------|
| varcomp | Vector of known dam, sire, dam by sire, and residual variance components, i.e. c(dam,sire,ds,res). |
| nval    | Vector of known dam, sire, and offspring per family sample sizes, i.e. c(dam,sire, offspring).     |
| alpha   | Statistical significance value. Default is 0.05.                                                   |
| nsim    | Number of simulations. Default is 100.                                                             |
| ml      | Default is FALSE for restricted maximum likelihood. Change to TRUE for maximum likelihood.         |

## Details

Extracts the dam, sire, dam, and dam by sire power values. Power values are calculated by stochastically simulation data and then calculating the proportion of significance values less than *alpha* for each component (Bolker 2008). Significance values for the random effects are determined using likelihood ratio tests (Bolker et al. 2009).

## Value

A data frame with the sample sizes, variance component inputs, variance component outputs, and power values.

## Note

Maximum likelihood (ML) estimates the parameters that maximize the likelihood of the observed data and has the advantage of using all the data and accounting for non-independence (Lynch and Walsh 1998, p. 779; Bolker et al. 2009). On the other hand, ML has the disadvantage of assuming that all fixed effects are known without error, producing a downward bias in the estimation of the residual variance component. This bias can be large if there are lots of fixed effects, especially if sample sizes are small. Restricted maximum likelihood (REML) has the advantage of not assuming the fixed effects are known and averages over the uncertainty, so there can be less bias in the estimation of the residual variance component. However, REML only maximizes a portion of the likelihood to estimate the effect parameters, but is the preferred method for analyzing large data sets with complex structure.

## References

- Bolker BM. 2008. Ecological models and data in R. Princeton University Press, New Jersey.
- Bolker BM, Brooks ME, Clark CJ, Geange SW, Poulsen JR, Stevens MHH, White J-SS. 2009. Generalized linear mixed models: a practical guide for ecology and evolution. Trends in Ecology and Evolution 24(3): 127-135. DOI: 10.1016/j.tree.2008.10.008
- Lynch M, Walsh B. 1998. Genetics and Analysis of Quantitative Traits. Sinauer Associates, Massachusetts.

## See Also

[powerLmer2](#), [powerLmer3](#)

## Examples

```
#100 simulations
#pwr_L1<- powerLmer(varcomp=c(0.19,0.03,0.02,0.76),nval=c(10,10,20))
#pwr_L1
#5simulations
pwr_L1<- powerLmer(varcomp=c(0.19,0.03,0.02,0.76),nval=c(10,10,20),nsim=5)
pwr_L1
```

**Description**

Extracts the power values of dam, sire, and dam by sire variance components from a linear mixed-effect model using the *lmer* function of the *lme4* package. Options to include one random position and/or one random block effect(s).

**Usage**

```
powerLmer2(varcomp, nval, alpha = 0.05, nsim = 100, position = NULL, block = NULL, ml = F)
```

**Arguments**

|          |                                                                                                                                                                                                                                        |
|----------|----------------------------------------------------------------------------------------------------------------------------------------------------------------------------------------------------------------------------------------|
| varcomp  | Vector of known dam, sire, dam by sire, residual, and position and/or block variance components, i.e. <code>c(dam,sire,ds,res,position/block)</code> . If there is a position and a block <code>c(..., res, position, block)</code> .  |
| nval     | Vector of known dam, sire, offspring per family, and position and/or block sample sizes, i.e. <code>c(dam,sire,offspring,position/block)</code> . If there is a position and a block <code>c(..., offspring, position, block)</code> . |
| alpha    | Statistical significance value. Default is 0.05.                                                                                                                                                                                       |
| nsim     | Number of simulations. Default is 100.                                                                                                                                                                                                 |
| position | Optional number of replicates to divide the number of offspring for the number of positions.                                                                                                                                           |
| block    | Optional vector of dams and sires per block, e.g. <code>c(2,2)</code> .                                                                                                                                                                |
| ml       | Default is FALSE for restricted maximum likelihood. Change to TRUE for maximum likelihood.                                                                                                                                             |

**Details**

Extracts the dam, sire, dam, dam by sire, and position and/or block power values. Power values are calculated by stochastically simulation data and then calculating the proportion of significance values less than *alpha* for each component (Bolker 2008). Significance values for the random effects are determined using likelihood ratio tests (Bolker et al. 2009).

**Value**

A data frame with the sample sizes, variance component inputs, variance component outputs, and power values.

**Note**

Maximum likelihood (ML) estimates the parameters that maximize the likelihood of the observed data and has the advantage of using all the data and accounting for non-independence (Lynch and Walsh 1998, p. 779; Bolker et al. 2009). On the other hand, ML has the disadvantage of assuming that all fixed effects are known without error, producing a downward bias in the estimation of the residual variance component. This bias can be large if there are lots of fixed effects, especially if

sample sizes are small. Restricted maximum likelihood (REML) has the advantage of not assuming the fixed effects are known and averages over the uncertainty, so there can be less bias in the estimation of the residual variance component. However, REML only maximizes a portion of the likelihood to estimate the effect parameters, but is the preferred method for analyzing large data sets with complex structure.

## References

- Bolker BM. 2008. Ecological models and data in R. Princeton University Press, New Jersey.
- Bolker BM, Brooks ME, Clark CJ, Geange SW, Poulsen JR, Stevens MHH, White J-SS. 2009. Generalized linear mixed models: a practical guide for ecology and evolution. *Trends in Ecology and Evolution* 24(3): 127-135. DOI: 10.1016/j.tree.2008.10.008
- Lynch M, Walsh B. 1998. Genetics and Analysis of Quantitative Traits. Sinauer Associates, Massachusetts.

## See Also

[powerLmer](#), [powerLmer3](#)

## Examples

```
#100 simulations
#pwr_L2<- powerLmer2(varcomp=c(0.19,0.03,0.02,0.66,0.1),nval=c(10,10,20,10),position=2)
#pwr_L2
#5 simulations
pwr_L2<- powerLmer2(varcomp=c(0.19,0.03,0.02,0.66,0.1),nval=c(10,10,20,10),position=2,
nsim=5)
pwr_L2
```

---

powerLmer3

*Power analysis for normal data 3*

---

## Description

Extracts the power values of dam, sire, and dam by sire variance components from a linear mixed-effect model using the *lmer* function of the *lme4* package. Model can include additional fixed and/or random effects.

## Usage

```
powerLmer3(var_rand, n_rand, design, remain, var_fix = NULL, n_fix = NULL,
alpha = 0.05, nsim = 100, ml = F, ftest = "LR", iter = NULL)
```

## Arguments

- |          |                                                                                                                                                    |
|----------|----------------------------------------------------------------------------------------------------------------------------------------------------|
| var_rand | Vector of known dam, sire, dam by sire, residual, and remaining random variance components, i.e. <code>c(dam,sire,ds,res,rand1,rand2,...)</code> . |
| n_rand   | Vector of known dam, sire, family, and remaining random sample sizes, i.e. <code>c(dam,sire,family,rand1,rand2,...)</code> .                       |

|         |                                                                                                                                                                                                                                                                                          |
|---------|------------------------------------------------------------------------------------------------------------------------------------------------------------------------------------------------------------------------------------------------------------------------------------------|
| design  | A data frame of the experimental design, using only integers. First three columns must contain and be named "dam", "sire", "family". Remaining columns are the random effects followed by the fixed effects. Continuous fixed effects are a column containing the values 1:nrow(design). |
| remain  | Remaining formula using <i>lme4</i> package format. Must be random effects followed by fixed effects. No interactions or random slopes; formulate as intercepts in design.                                                                                                               |
| var_fix | Vector of known fixed variance components, i.e. c(fix1,fix2,...). Continuous fixed random values are sorted to match column values.                                                                                                                                                      |
| n_fix   | Vector of known fixed sample sizes, i.e. c(fix1,fix2,...). Continuous fixed effects must have a sample size of 1.                                                                                                                                                                        |
| alpha   | Statistical significance value. Default is 0.05.                                                                                                                                                                                                                                         |
| nsim    | Number of simulations. Default is 100.                                                                                                                                                                                                                                                   |
| ml      | Default is FALSE for restricted maximum likelihood. Change to TRUE for maximum likelihood.                                                                                                                                                                                               |
| ftest   | Default is "LR" for likelihood ratio test for fixed effects. Option "PB" is for parametric bootstrap.                                                                                                                                                                                    |
| iter    | Number of iterations for computing the parametric bootstrap significance value for any fixed effects.                                                                                                                                                                                    |

### Details

Extracts the dam, sire, dam, dam by sire, and any remaining random and fixed effects power values. Power values are calculated by stochastically simulation data and then calculating the proportion of significance values less than *alpha* for each component (Bolker 2008). Significance values for the random effects are determined using likelihood ratio tests (Bolker et al. 2009). Significance values for any fixed effects are determined using likelihood ratio tests or parametric bootstrap method (Bolker et al. 2009) from the *mixed* function of the *afex* package.

### Value

A data frame with the sample sizes, variance component inputs, variance component outputs, and power values.

### Note

Maximum likelihood (ML) estimates the parameters that maximize the likelihood of the observed data and has the advantage of using all the data and accounting for non-independence (Lynch and Walsh 1998, p. 779; Bolker et al. 2009). On the other hand, ML has the disadvantage of assuming that all fixed effects are known without error, producing a downward bias in the estimation of the residual variance component. This bias can be large if there are lots of fixed effects, especially if sample sizes are small. Restricted maximum likelihood (REML) has the advantage of not assuming the fixed effects are known and averages over the uncertainty, so there can be less bias in the estimation of the residual variance component. However, REML only maximizes a portion of the likelihood to estimate the effect parameters, but is the preferred method for analyzing large data sets with complex structure.

### References

Bolker BM. 2008. Ecological models and data in R. Princeton University Press, New Jersey.

Bolker BM, Brooks ME, Clark CJ, Geange SW, Poulsen JR, Stevens MHH, White J-SS. 2009. Generalized linear mixed models: a practical guide for ecology and evolution. *Trends in Ecology and Evolution* 24(3): 127-135. DOI: 10.1016/j.tree.2008.10.008

Lynch M, Walsh B. 1998. *Genetics and Analysis of Quantitative Traits*. Sinauer Associates, Massachusetts.

## See Also

[powerLmer](#), [powerLmer2](#)

## Examples

```
##design object: 2 remaining random effects and 1 continous fixed effect
block=c(2,2); blocN=10; position=2; posN=10; offN=20
dam0<- stack(as.data.frame(matrix(1:(block[1]*blocN),ncol=blocN,nrow=block[1])))
sire0<- stack(as.data.frame(matrix(1:(block[2]*blocN),ncol=blocN,nrow=block[2])))
observ0<- merge(dam0,sire0, by="ind")
levels(observ0[,1])<- 1:blocN; colnames(observ0)<- c("block","dam","sire")
observ0$family<- 1:nrow(observ0) #add family
#expand for position
observ1<- do.call("rbind", replicate(position,observ0,simplify=FALSE));rm(observ0)
observ1$position<- sample(rep(1:posN,each=position)) #random assignment
#expand for offspring
observ<- do.call("rbind", replicate(offN,observ1,simplify=FALSE)); rm(observ1)
desn<- observ[,c(2,3,4,5,1)];rm(observ) #dam,sire,family,position,block
desn$egg_size<- 1:nrow(desn)
colnames(desn)[6]<- "egg_size"

#100 simulations
#pwr_L3<- powerLmer3(var_rand=c(0.19,0.03,0.02,0.51,0.1,0.05),n_rand=c(20,20,40,10,10),
#var_fix=0.1,n_fix=1,design=desn,remain="(1|position)+(1|block)+egg_size")
#pwr_L3
#5 simulations
pwr_L3<- powerLmer3(var_rand=c(0.19,0.03,0.02,0.51,0.1,0.05),n_rand=c(20,20,40,10,10),
var_fix=0.1,n_fix=1,design=desn,remain="(1|position)+(1|block)+egg_size",nsim=5)
pwr_L3
```

---

resampFamily

*Bootstrap resample within families*

---

## Description

Bootstrap resample observations grouped by family identities for a specified number of iterations to create a resampled data set.

## Usage

```
resampFamily(dat, copy, family, iter)
```



**Arguments**

|        |                                                     |
|--------|-----------------------------------------------------|
| dat    | Data frame observed data to resample.               |
| copy   | Column numbers to copy.                             |
| family | Column name containing family identity information. |
| iter   | Number of iterations for resampling.                |

**Details**

The resampled data can be used for producing bootstrap confidence intervals.

**Value**

Because of the large file sizes that can be produced, the resampling of each family X is saved separately as a common separated (X\_resampF.csv) file in the working directory. These files are merged to create the final resampled data set (resamp\_datF.csv).

**See Also**

[resampRepli](#)

**Examples**

```
data(chinook_length) #Chinook salmon offspring length
#resampFamily(dat=chinook_length,copy=c(3:8),family="family",iter=1000)
resampFamily(dat=chinook_length,copy=c(3:8),family="family",iter=2)
#example with a couple iterations
```

---

resampGlmr

*Bootstrap components for non-normal data*


---

**Description**

Extracts additive genetic, non-additive genetic, and maternal variance components from a generalized linear mixed-effect model using the *glmer* function of the *lme4* package. Model random effects are dam, sire, and dam by sire.

**Usage**

```
resampGlmr(resamp, dam, sire, response, fam_link, start, end, quasi = F)
```

**Arguments**

|          |                                                                                                                                       |
|----------|---------------------------------------------------------------------------------------------------------------------------------------|
| resamp   | Data frame of bootstrap resampled data.                                                                                               |
| dam      | Column name containing dam(female) parent identity information.                                                                       |
| sire     | Column name containing sire(male) parent identity information.                                                                        |
| response | Column name containing the offspring (response) phenotype values.                                                                     |
| fam_link | The family and link in family(link) format. Supported options are binomial(logit), binomial(probit), poisson(log), and poisson(sqrt). |
| start    | Starting model number.                                                                                                                |
| end      | Ending model number.                                                                                                                  |
| quasi    | Incorporate overdispersion or quasi-error structure.                                                                                  |

## Details

Used for bootstrap resampled data set produced using *resampRepli* or *resampFamily*. Laplace approximation parameter estimation is used, which is a true likelihood method (Bolker et al. 2009). For the overdispersion option, an observation-level random effect is added to the model (Atkins et al. 2013). Extracts the dam, sire, dam, and dam by sire variance components. The residual variance component for the *fam\_links* are described by Nakagawa and Schielzeth (2010, 2013). Calculates the total variance component. Calculates the additive genetic, non-additive genetic, and maternal variance components (see Lynch and Walsh 1998, p. 603).

## Value

A data frame with columns containing the raw variance components for dam, sire, dam by sire, residual, total, additive genetic, non-additive genetic, and maternal. The number of rows in the data frame matches the number of iterations in the resampled data set and each row represents a model number.

## Note

The Laplace approximation is used because there were fewer disadvantages relative to penalized quasi-likelihood and Gauss-Hermite quadrature parameter estimation (Bolker et al. 2009). That is, penalized quasi-likelihood is not recommended for count responses with means less than 5 and binary responses with less than 5 successes per group. Gauss-Hermite quadrature is not recommended for more than two or three random effects because of the rapidly declining analytical speed with the increasing number of random effects.

## References

- Atkins DC, Baldwin SA, Zheng C, Gallop RJ, Neighbors C. 2013. A tutorial on count regression and zero-altered count models for longitudinal substance use data. *Psychology of Addictive Behaviors* 27(1): 166-177. DOI: 10.1037/a0029508
- Bolker BM, Brooks ME, Clark CJ, Geange SW, Poulsen JR, Stevens MHH, White J-SS. 2009. Generalized linear mixed models: a practical guide for ecology and evolution. *Trends in Ecology and Evolution* 24(3): 127-135. DOI: 10.1016/j.tree.2008.10.008
- Lynch M, Walsh B. 1998. *Genetics and Analysis of Quantitative Traits*. Sinauer Associates, Massachusetts.
- Nakagawa S, Schielzeth H. 2010. Repeatability for Gaussian and non-Gaussian data: a practical guide for biologists. *Biological Reviews* 85(4): 935-956. DOI: 10.1111/j.1469-185X.2010.00141.x
- Nakagawa S, Schielzeth H. 2013. A general and simple method for obtaining R<sup>2</sup> from generalized linear mixed-effects models. *Methods in Ecology and Evolution* 4(2): 133-142. DOI: 10.1111/j.2041-210x.2012.00261.x

## See Also

[resampGlmr2](#), [resampGlmr3](#)

## Examples

```
data(chinook_resampS) #5 iterations

#survival_rcomp<- resampGlmr(resamp=survival_datR,dam="dam",sire="sire",response="status",
#fam_link=binomial(logit),start=1,end=1000)
survival_rcomp<- resampGlmr(resamp=chinook_resampS,dam="dam",sire="sire",response="status",
fam_link=binomial(logit),start=1,end=2) #first 2 models, a few minutes
```

resampGlmr2

*Bootstrap components for non-normal data 2***Description**

Extracts additive genetic, non-additive genetic, and maternal variance components from a generalized linear mixed-effect model using the *glmer* function of the *lme4* package. Model random effects are dam, sire, and dam by sire. Options to include one random position and/or one random block effect(s).

**Usage**

```
resampGlmr2(resamp, dam, sire, response, fam_link, start, end, position = NULL,
            block = NULL, quasi = F)
```

**Arguments**

|          |                                                                                                                                        |
|----------|----------------------------------------------------------------------------------------------------------------------------------------|
| resamp   | Data frame of bootstrap resampled data.                                                                                                |
| dam      | Column name containing dam(female) parent identity information.                                                                        |
| sire     | Column name containing sire(male) parent identity information.                                                                         |
| response | Column name containing the offspring (response) phenotype values.                                                                      |
| fam_link | The family and link in family(link) format. Supported options are binomial(logit), binomial(probit), poisson(log), and poisson (sqrt). |
| start    | Starting model number.                                                                                                                 |
| end      | Ending model number.                                                                                                                   |
| position | Optional column name containing position factor information.                                                                           |
| block    | Optional column name containing block factor information.                                                                              |
| quasi    | Incorporate overdispersion or quasi-error structure.                                                                                   |

**Details**

Used for bootstrap resampled data set produced using *resampRepli* or *resampFamily*. Laplace approximation parameter estimation is used, which is a true likelihood method (Bolker et al. 2009). For the overdispersion option, an observation-level random effect is added to the model (Atkins et al. 2013). Extracts the dam, sire, dam, and dam by sire variance components. Extracts optional position and block variance components. The residual variance component for the *fam\_links* are described by Nakagawa and Schielzeth (2010, 2013). Calculates the total variance component. Calculates the additive genetic, non-additive genetic, and maternal variance components (see Lynch and Walsh 1998, p. 603).

**Value**

A data frame with columns containing the raw variance components for dam, sire, dam by sire, residual, total, additive genetic, non-additive genetic, and maternal. Also columns containing the raw variance components for the options of position and/or block. The number of rows in the data frame matches the number of iterations in the resampled data set and each row represents a model number.

**Note**

The Laplace approximation is used because there were fewer disadvantages relative to penalized quasi-likelihood and Gauss-Hermite quadrature parameter estimation (Bolker et al. 2009). That is, penalized quasi-likelihood is not recommended for count responses with means less than 5 and binary responses with less than 5 successes per group. Gauss-Hermite quadrature is not recommended for more than two or three random effects because of the rapidly declining analytical speed with the increasing number of random effects.

**References**

- Atkins DC, Baldwin SA, Zheng C, Gallop RJ, Neighbors C. 2013. A tutorial on count regression and zero-altered count models for longitudinal substance use data. *Psychology of Addictive Behaviors* 27(1): 166-177. DOI: 10.1037/a0029508
- Bolker BM, Brooks ME, Clark CJ, Geange SW, Poulsen JR, Stevens MHH, White J-SS. 2009. Generalized linear mixed models: a practical guide for ecology and evolution. *Trends in Ecology and Evolution* 24(3): 127-135. DOI: 10.1016/j.tree.2008.10.008
- Lynch M, Walsh B. 1998. *Genetics and Analysis of Quantitative Traits*. Sinauer Associates, Massachusetts.
- Nakagawa S, Schielzeth H. 2010. Repeatability for Gaussian and non-Gaussian data: a practical guide for biologists. *Biological Reviews* 85(4): 935-956. DOI: 10.1111/j.1469-185X.2010.00141.x
- Nakagawa S, Schielzeth H. 2013. A general and simple method for obtaining R2 from generalized linear mixed-effects models. *Methods in Ecology and Evolution* 4(2): 133-142. DOI: 10.1111/j.2041-210x.2012.00261.x

**See Also**

[resampGlm3](#), [resampGlm2](#)

**Examples**

```
data(chinook_resampS) #5 iterations

#survival_rcomp2<- resampGlm2(resamp=survival_datR,dam="dam",sire="sire",response="status",
#fam_link=binomial(logit),start=1,end=1000,position="tray")
survival_rcomp2<- resampGlm2(resamp=chinook_resampS,dam="dam",sire="sire",response="status",
fam_link=binomial(logit),start=1,end=2,position="tray") #first 2 models, a few minutes
```

---

resampGlm3

*Bootstrap components for non-normal data 3*

---

**Description**

Extracts additive genetic, non-additive genetic, and maternal variance components from a generalized linear mixed-effect model using the *glmer* function of the *lme4* package. Model random effects are dam, sire, dam by sire, and any additional fixed and/or random effects.

**Usage**

```
resampGlm3(resamp, dam, sire, response, fam_link, start, end, remain, quasi = F)
```

**Arguments**

|          |                                                                                                                                        |
|----------|----------------------------------------------------------------------------------------------------------------------------------------|
| resamp   | Data frame of bootstrap resampled data.                                                                                                |
| dam      | Column name containing dam(female) parent identity information.                                                                        |
| sire     | Column name containing sire(male) parent identity information.                                                                         |
| response | Column name containing the offspring (response) phenotype values.                                                                      |
| fam_link | The family and link in family(link) format. Supported options are binomial(logit), binomial(probit), poisson(log), and poisson (sqrt). |
| start    | Starting model number.                                                                                                                 |
| end      | Ending model number.                                                                                                                   |
| remain   | Remaining formula using <i>lme4</i> package format with # sign (see column names), e.g. fixed# + (1 random#).                          |
| quasi    | Incorporate overdispersion or quasi-error structure.                                                                                   |

**Details**

Used for bootstrap resampled data set produced using *resampRepli* or *resampFamily*. Laplace approximation parameter estimation is used, which is a true likelihood method (Bolker et al. 2009). For the overdispersion option, an observation-level random effect is added to the model (Atkins et al. 2013). Extracts the dam, sire, dam, and dam by sire variance components. Extracts any additional fixed effect and random effect variance components. The fixed-effect variance component is as a single group using the method described by Nakagawa and Schielzeth (2013). The residual variance component for the *fam\_links* are described by Nakagawa and Schielzeth (2010, 2013). Calculates the total variance component. Calculates the additive genetic, non-additive genetic, and maternal variance components (see Lynch and Walsh 1998, p. 603).

**Value**

A data frame with columns containing the raw variance components for dam, sire, dam by sire, residual, total, additive genetic, non-additive genetic, and maternal. Also columns containing the raw variance components for remaining formula components. The number of rows in the data frame matches the number of iterations in the resampled data set and each row represents a model number.

**Note**

The Laplace approximation is used because there were fewer disadvantages relative to penalized quasi-likelihood and Gauss-Hermite quadrature parameter estimation (Bolker et al. 2009). That is, penalized quasi-likelihood is not recommended for count responses with means less than 5 and binary responses with less than 5 successes per group. Gauss-Hermite quadrature is not recommended for more than two or three random effects because of the rapidly declining analytical speed with the increasing number of random effects.

**References**

- Atkins DC, Baldwin SA, Zheng C, Gallop RJ, Neighbors C. 2013. A tutorial on count regression and zero-altered count models for longitudinal substance use data. *Psychology of Addictive Behaviors* 27(1): 166-177. DOI: 10.1037/a0029508
- Bolker BM, Brooks ME, Clark CJ, Geange SW, Poulsen JR, Stevens MHH, White J-SS. 2009. Generalized linear mixed models: a practical guide for ecology and evolution. *Trends in Ecology and Evolution* 24(3): 127-135. DOI: 10.1016/j.tree.2008.10.008

Lynch M, Walsh B. 1998. *Genetics and Analysis of Quantitative Traits*. Sinauer Associates, Massachusetts.

Nakagawa S, Schielzeth H. 2010. Repeatability for Gaussian and non-Gaussian data: a practical guide for biologists. *Biological Reviews* 85(4): 935-956. DOI: 10.1111/j.1469-185X.2010.00141.x

Nakagawa S, Schielzeth H. 2013. A general and simple method for obtaining R<sup>2</sup> from generalized linear mixed-effects models. *Methods in Ecology and Evolution* 4(2): 133-142. DOI: 10.1111/j.2041-210x.2012.00261.x

### See Also

[resampGlm](#), [resampGlm2](#)

### Examples

```
data(chinook_resampS) #5 iterations

#survival_rcomp3<- resampGlm3(resamp=survival_datR,dam="dam",sire="sire",
#response="status",fam_link=binomial(logit),start=1,end=1000,
#remain="egg_size# + (1|tray#)")
survival_rcomp3<- resampGlm3(resamp=chinook_resampS,dam="dam",sire="sire",
response="status",fam_link=binomial(logit),start=1,end=2,
remain="egg_size# + (1|tray#)") #first 2 models, a few minutes
```

---

resampLmer

*Bootstrap components for normal data*

---

### Description

Extracts additive genetic, non-additive genetic, and maternal variance components from a linear mixed-effect model using the *lmer* function of the *lme4* package. Model random effects are dam, sire, and dam by sire.

### Usage

```
resampLmer(resamp, dam, sire, response, start, end, ml = F)
```

### Arguments

|          |                                                                                            |
|----------|--------------------------------------------------------------------------------------------|
| resamp   | Data frame of bootstrap resampled data.                                                    |
| dam      | Column name containing dam(female) parent identity information.                            |
| sire     | Column name containing sire(male) parent identity information.                             |
| response | Column name containing the offspring (response) phenotype values.                          |
| start    | Starting model number.                                                                     |
| end      | Ending model number.                                                                       |
| ml       | Default is FALSE for restricted maximum likelihood. Change to TRUE for maximum likelihood. |

## Details

Used for bootstrap resampled data set produced using *resampRepli* or *resampFamily*. Extracts the dam, sire, dam, dam by sire, and residual variance components. Calculates the total variance component. Calculates the additive genetic, non-additive genetic, and maternal variance components (see Lynch and Walsh 1998, p. 603).

## Value

A data frame with columns containing the raw variance components for dam, sire, dam by sire, residual, total, additive genetic, non-additive genetic, and maternal. The number of rows in the data frame matches the number of iterations in the resampled data set and each row represents a model number.

## Note

Maximum likelihood (ML) estimates the parameters that maximize the likelihood of the observed data and has the advantage of using all the data and accounting for non-independence (Lynch and Walsh 1998, p. 779; Bolker et al. 2009). On the other hand, ML has the disadvantage of assuming that all fixed effects are known without error, producing a downward bias in the estimation of the residual variance component. This bias can be large if there are lots of fixed effects, especially if sample sizes are small. Restricted maximum likelihood (REML) has the advantage of not assuming the fixed effects are known and averages over the uncertainty, so there can be less bias in the estimation of the residual variance component. However, REML only maximizes a portion of the likelihood to estimate the effect parameters, but is the preferred method for analyzing large data sets with complex structure.

## References

Bolker BM, Brooks ME, Clark CJ, Geange SW, Poulsen JR, Stevens MHH, White J-SS. 2009. Generalized linear mixed models: a practical guide for ecology and evolution. *Trends in Ecology and Evolution* 24(3): 127-135. DOI: 10.1016/j.tree.2008.10.008

Lynch M, Walsh B. 1998. *Genetics and Analysis of Quantitative Traits*. Sinauer Associates, Massachusetts.

## See Also

[resampLmer2](#), [resampLmer3](#)

## Examples

```
data(chinook_resampL) #5 iterations

#length_rcomp1<- resampLmer(resamp=length_datR,dam="dam",sire="sire",response="length",
#start=1,end=1000)
length_rcomp1<- resampLmer(resamp=chinook_resampL,dam="dam",sire="sire",response="length",
start=1,end=5)
```

resampLmer2

*Bootstrap components for normal data 2***Description**

Extracts additive genetic, non-additive genetic, and maternal variance components from a linear mixed-effect model using the *lmer* function of the *lme4* package. Model random effects are dam, sire, and dam by sire. Options to include one random position and/or one random block effect(s).

**Usage**

```
resampLmer2(resamp, dam, sire, response, start, end, position = NULL, block = NULL,
ml = F)
```

**Arguments**

|          |                                                                                            |
|----------|--------------------------------------------------------------------------------------------|
| resamp   | Data frame of bootstrap resampled data.                                                    |
| dam      | Column name containing dam(female) parent identity information.                            |
| sire     | Column name containing sire(male) parent identity information.                             |
| response | Column name containing the offspring (response) phenotype values.                          |
| start    | Starting model number.                                                                     |
| end      | Ending model number.                                                                       |
| position | Optional column name containing position factor information.                               |
| block    | Optional column name containing block factor information.                                  |
| ml       | Default is FALSE for restricted maximum likelihood. Change to TRUE for maximum likelihood. |

**Details**

Used for bootstrap resampled data set produced using *resampRepli* or *resampFamily*. Extracts the dam, sire, dam, dam by sire, and residual variance components. Extracts optional position and block variance components. Calculates the total variance component. Calculates the additive genetic, non-additive genetic, and maternal variance components (see Lynch and Walsh 1998, p. 603).

**Value**

A data frame with columns containing the raw variance components for dam, sire, dam by sire, residual, total, additive genetic, non-additive genetic, and maternal. Also columns containing the raw variance components for the options of position and/or block. The number of rows in the data frame matches the number of iterations in the resampled data set and each row represents a model number.

**Note**

Maximum likelihood (ML) estimates the parameters that maximize the likelihood of the observed data and has the advantage of using all the data and accounting for non-independence (Lynch and Walsh 1998, p. 779; Bolker et al. 2009). On the other hand, ML has the disadvantage of assuming that all fixed effects are known without error, producing a downward bias in the estimation of the residual variance component. This bias can be large if there are lots of fixed effects, especially if



sample sizes are small. Restricted maximum likelihood (REML) has the advantage of not assuming the fixed effects are known and averages over the uncertainty, so there can be less bias in the estimation of the residual variance component. However, REML only maximizes a portion of the likelihood to estimate the effect parameters, but is the preferred method for analyzing large data sets with complex structure.

## References

Bolker BM, Brooks ME, Clark CJ, Geange SW, Poulsen JR, Stevens MHH, White J-SS. 2009. Generalized linear mixed models: a practical guide for ecology and evolution. *Trends in Ecology and Evolution* 24(3): 127-135. DOI: 10.1016/j.tree.2008.10.008

Lynch M, Walsh B. 1998. *Genetics and Analysis of Quantitative Traits*. Sinauer Associates, Massachusetts.

## See Also

[resampLmer](#), [resampLmer3](#)

## Examples

```
data(chinook_resampL) #5 iterations

#length_rcomp2<- resampLmer2(resamp=length_datR,dam="dam",sire="sire",response="length",
#start=1,end=1000,position="tray")
length_rcomp2<- resampLmer2(resamp=chinook_resampL,dam="dam",sire="sire",response="length",
start=1,end=5,position="tray")
```

---

resampLmer3

*Bootstrap components for normal data 3*

---

## Description

Extracts additive genetic, non-additive genetic, and maternal variance components from a linear mixed-effect model using the *lmer* function of the *lme4* package. Model random effects are dam, sire, dam by sire, and any additional fixed and/or random effects.

## Usage

```
resampLmer3(resamp, dam, sire, response, start, end, remain, ml = F)
```

## Arguments

|          |                                                                                                               |
|----------|---------------------------------------------------------------------------------------------------------------|
| resamp   | Data frame of bootstrap resampled data.                                                                       |
| dam      | Column name containing dam(female) parent identity information.                                               |
| sire     | Column name containing sire(male) parent identity information.                                                |
| response | Column name containing the offspring (response) phenotype values.                                             |
| start    | Starting model number.                                                                                        |
| end      | Ending model number.                                                                                          |
| remain   | Remaining formula using <i>lme4</i> package format with # sign (see column names), e.g. fixed# + (1 random#). |
| ml       | Default is FALSE for restricted maximum likelihood. Change to TRUE for maximum likelihood.                    |

## Details

Used for bootstrap resampled data set produced using *resampRepli* or *resampFamily*. Extracts the dam, sire, dam, dam by sire, and residual variance components. Extracts any additional fixed effect and random effect variance components. The fixed-effect variance component is as a single group using the method described by Nakagawa and Schielzeth (2013). Calculates the total variance component. Calculates the additive genetic, non-additive genetic, and maternal variance components (see Lynch and Walsh 1998, p. 603).

## Value

A data frame with columns containing the raw variance components for dam, sire, dam by sire, residual, total, additive genetic, non-additive genetic, and maternal. Also columns containing the raw variance components for remaining formula components. The number of rows in the data frame matches the number of iterations in the resampled data set and each row represents a model number.

## Note

Maximum likelihood (ML) estimates the parameters that maximize the likelihood of the observed data and has the advantage of using all the data and accounting for non-independence (Lynch and Walsh 1998, p. 779; Bolker et al. 2009). On the other hand, ML has the disadvantage of assuming that all fixed effects are known without error, producing a downward bias in the estimation of the residual variance component. This bias can be large if there are lots of fixed effects, especially if sample sizes are small. Restricted maximum likelihood (REML) has the advantage of not assuming the fixed effects are known and averages over the uncertainty, so there can be less bias in the estimation of the residual variance component. However, REML only maximizes a portion of the likelihood to estimate the effect parameters, but is the preferred method for analyzing large data sets with complex structure.

## References

- Bolker BM, Brooks ME, Clark CJ, Geange SW, Poulsen JR, Stevens MHH, White J-SS. 2009. Generalized linear mixed models: a practical guide for ecology and evolution. *Trends in Ecology and Evolution* 24(3): 127-135. DOI: 10.1016/j.tree.2008.10.008
- Lynch M, Walsh B. 1998. *Genetics and Analysis of Quantitative Traits*. Sinauer Associates, Massachusetts.
- Nakagawa S, Schielzeth H. 2013. A general and simple method for obtaining R2 from generalized linear mixed-effects models. *Methods in Ecology and Evolution* 4(2): 133-142. DOI: 10.1111/j.2041-210x.2012.00261.x

## See Also

[resampLmer](#), [resampLmer2](#)

## Examples

```
data(chinook_resampL)

#length_rcomp3<- resampLmer3(resamp=length_datR,dam="dam",sire="sire",response="length",
#start=1,end=1000,remain="egg_size# + (1|tray#)")
length_rcomp3<- resampLmer3(resamp=chinook_resampL,dam="dam",sire="sire",response="length",
start=1,end=5,remain="egg_size# + (1|tray#)")
```

---

`resampRepli`*Bootstrap resample within replicates*

---

**Description**

Bootstrap resample observations grouped by replicate identities within family identities for a specified number of iterations to create a resampled data set.

**Usage**

```
resampRepli(dat, copy, family, replicate, iter)
```

**Arguments**

|                        |                                                        |
|------------------------|--------------------------------------------------------|
| <code>dat</code>       | Data frame observed data to resample.                  |
| <code>copy</code>      | Column numbers to copy.                                |
| <code>family</code>    | Column name containing family identity information.    |
| <code>replicate</code> | Column name containing replicate identity information. |
| <code>iter</code>      | Number of iterations for resampling.                   |

**Details**

The resampled data can be used for producing bootstrap confidence intervals.

**Value**

Because of the large file sizes that can be produced, the resampling of each replicate Y per family X is saved separately as a common separated (X\_Y\_resampR.csv) file in the working directory. These files are merged to create the final resampled data set (resamp\_datR.csv).

**See Also**

[resampFamily](#)

**Examples**

```
data(chinook_length) #Chinook salmon offspring length
#resampRepli(dat=chinook_length,copy=c(3:8),family="family",replicate="repli",iter=1000)
resampRepli(dat=chinook_length,copy=c(3:8),family="family",replicate="repli",iter=2)
#example with a couple iterations
```

# Index

## \*Topic **datasets**

- chinook\_bootL, 10
- chinook\_bootS, 11
- chinook\_jackL, 12
- chinook\_length, 13
- chinook\_resampL, 14
- chinook\_resampS, 15
- chinook\_survival, 16

## \*Topic **package**

- fullfact-package, 2

barMANA, 5

boxMANA, 6

buildBinary, 8, 9

buildMulti, 8, 9

chinook\_bootL, 10

chinook\_bootS, 11

chinook\_jackL, 12

chinook\_length, 13

chinook\_resampL, 14

chinook\_resampS, 15

chinook\_survival, 16

ciJack, 17, 20, 21

ciJack2, 18, 19, 21

ciJack3, 18, 20, 20

ciMANA, 21, 23, 25

ciMANA2, 22, 22, 25

ciMANA3, 22, 23, 24

fullfact (fullfact-package), 2

fullfact-package, 2

JackGlmer, 25, 29, 31

JackGlmer2, 27, 27, 31

JackGlmer3, 27, 29, 29

JackLmer, 31, 34, 36

JackLmer2, 33, 33, 36

JackLmer3, 33, 34, 35

observGlmer, 37, 39, 41

observGlmer2, 38, 38, 41

observGlmer3, 38, 39, 40

observLmer, 42, 44, 46

observLmer2, 43, 43, 46

observLmer3, 43, 44, 44

powerGlmer, 46, 49, 50

powerGlmer2, 47, 47, 50

powerGlmer3, 47, 49, 49

powerLmer, 51, 54, 56

powerLmer2, 52, 53, 56

powerLmer3, 52, 54, 54

resampFamily, 56, 67

resampGlmer, 57, 60, 62

resampGlmer2, 58, 59, 62

resampGlmer3, 58, 60, 60

resampLmer, 62, 65, 66

resampLmer2, 63, 64, 66

resampLmer3, 63, 65, 65

resampRepli, 57, 67
